# Supplementary material for: Mass-spectrometry-based proteomics enables rapid and accurate diagnosis of Lyme neuroborreliosis in adults
Source: Research Square preprint supplement (doi:10.21203/rs.3.rs-6048306/v1), 2025-02-28
Supplement: Supplementary file 1 [file 22f12199d7786c0b4860e11f.docx]

Supplementary Material


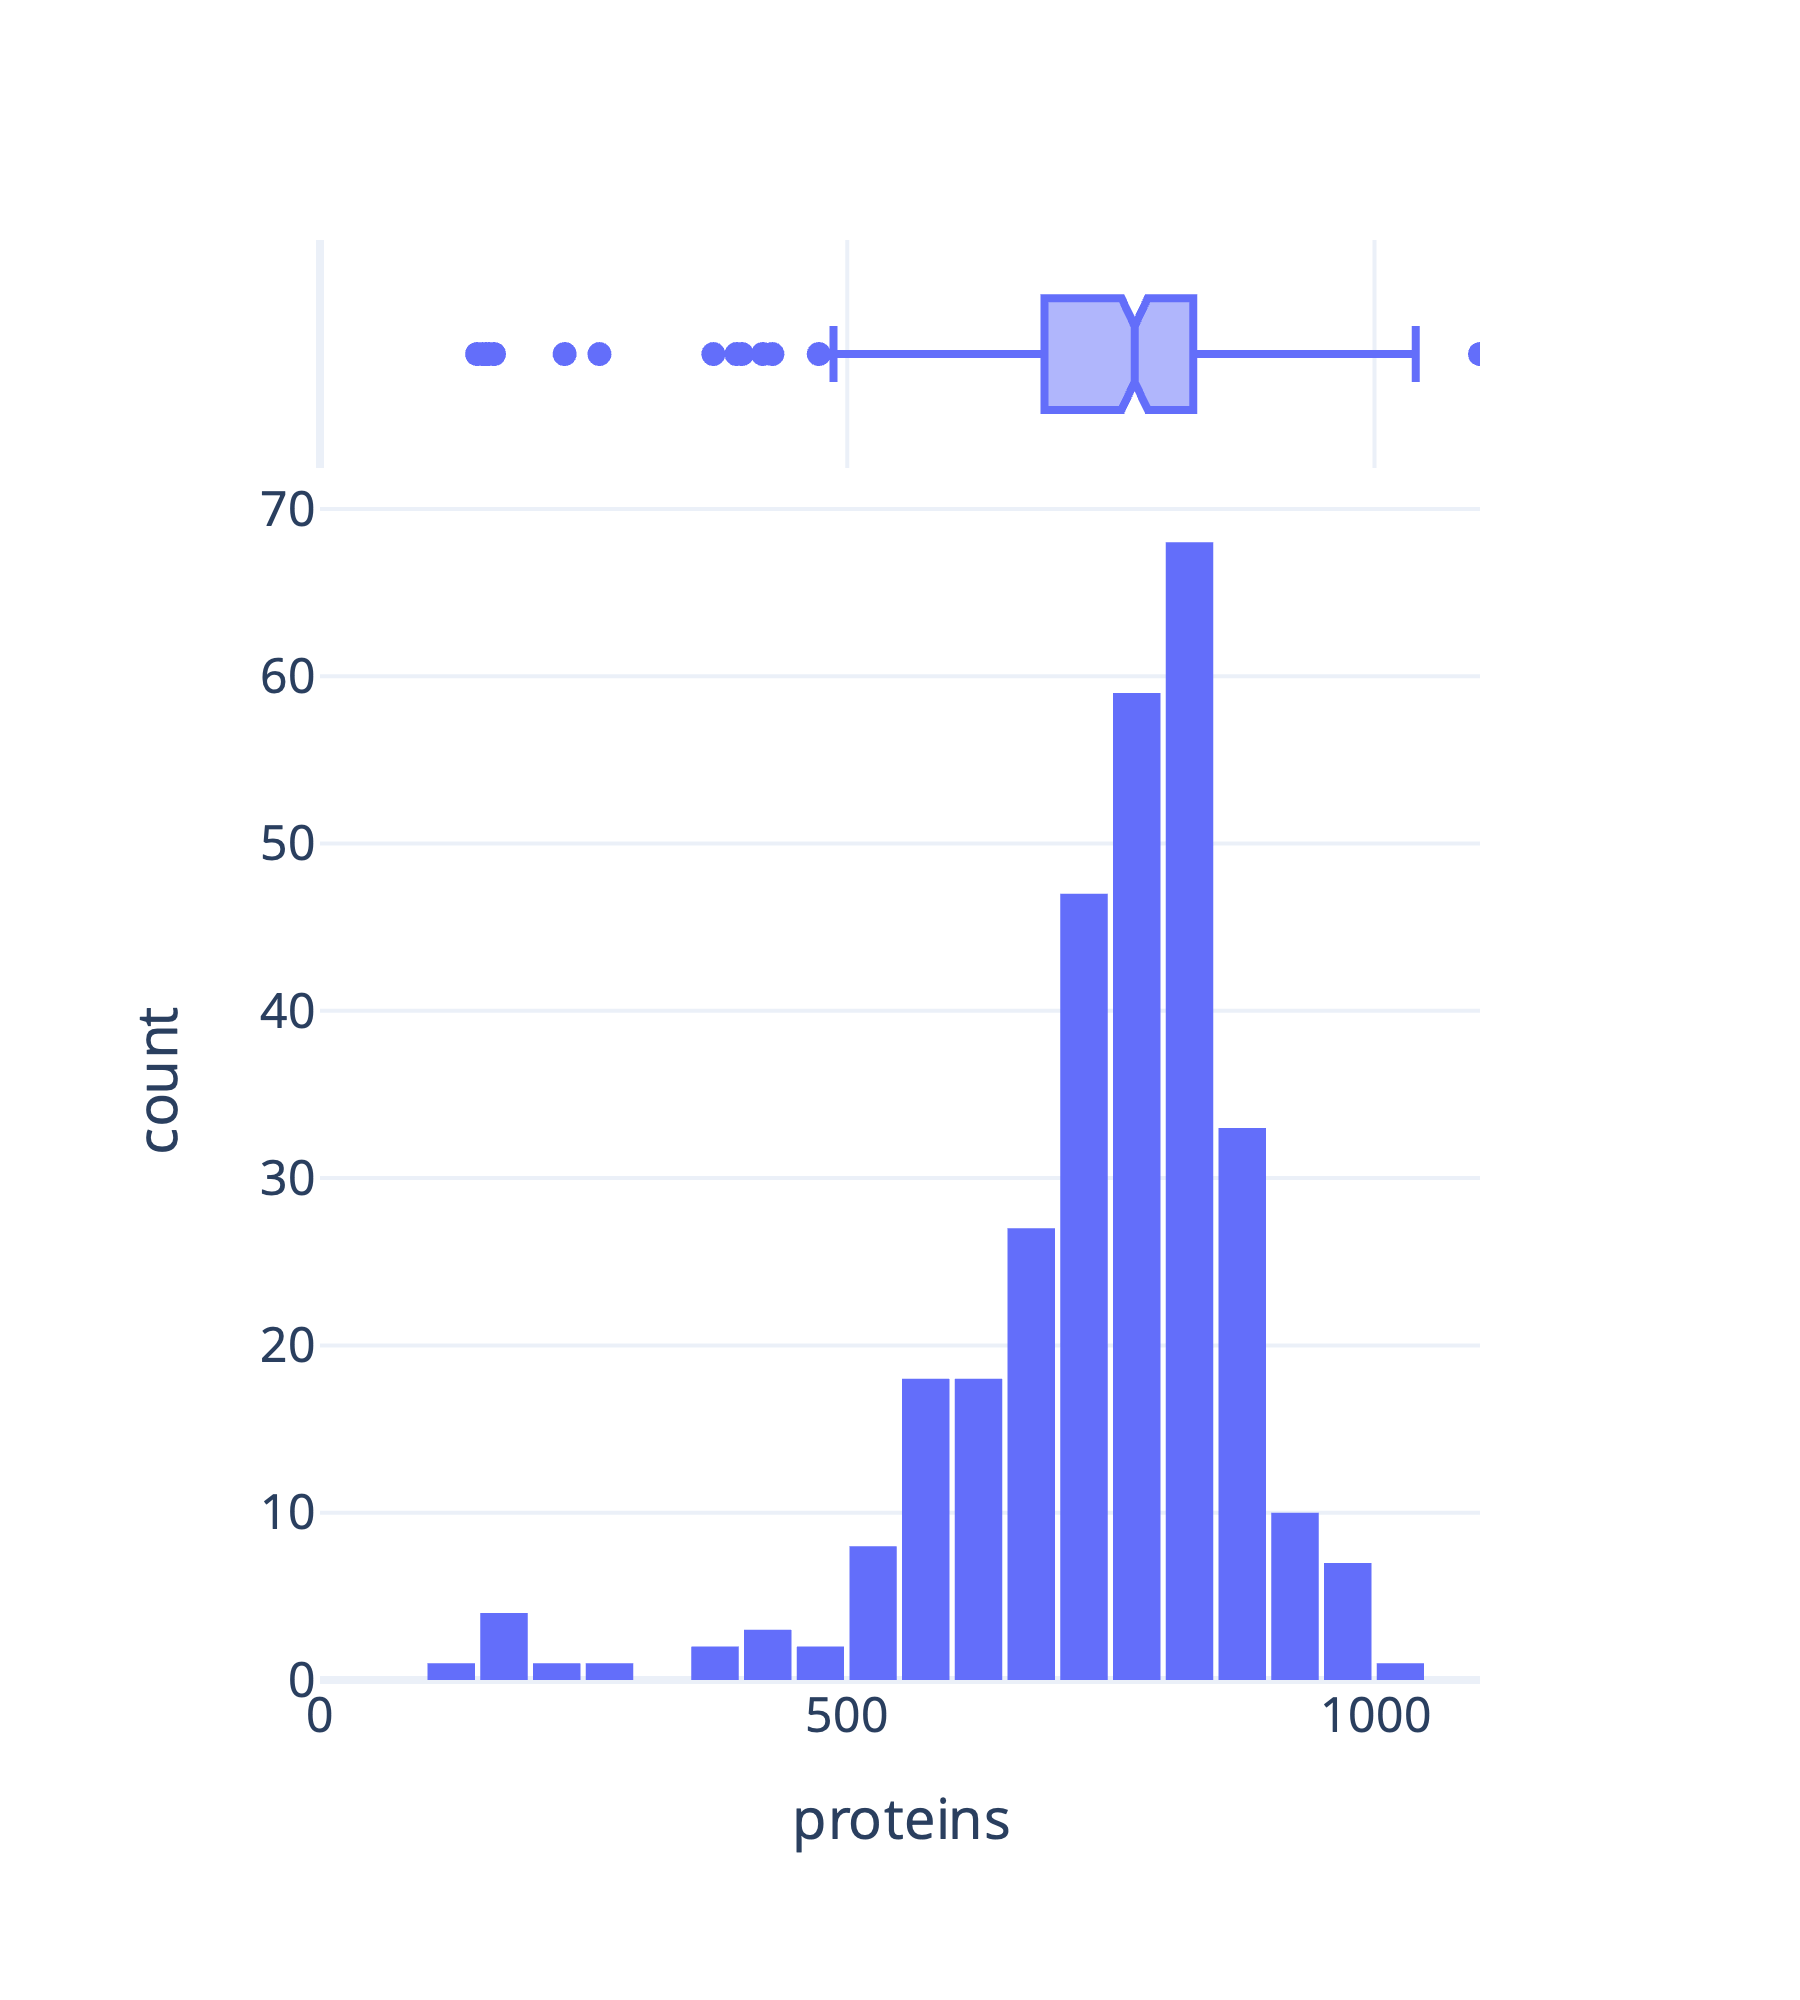


**Figure 1** Histogram and marginal boxplot of the number of proteins measured in each cerebrospinal fluid sample. Samples with low protein content were removed from analysis. The cutoff for low protein count was defined by a cutoff of 1.5IQR from the 25th quantile in the boxplot (473 proteins).

**Table 1** Overview of proteins with significant different protein levels in cerebrospinal fluid samples of patients with Lyme neuroborreliosis (LNB) compared to viral meningitis (VM) or controls. The column “Protein.Group” represent Uniprot identifiers. The magnitude of the change is represented by log(2) fold changes in the column “log2FC”. Only proteins with log2FC larger than 1 or smaller than -1 are included in the table. Log2FC is positive when the protein level is higher in LNB and negative when the protein level is higher in VM or controls. Gene Ontology terms and identifiers are included in the right column.

| group1 | group2 | Protein.Group | Genes | Adjusted p-value | log2FC | Gene Ontology term [indetifier] |
| --- | --- | --- | --- | --- | --- | --- |
| LNB | VM | A0A075B6K0 | IGLV3-16 | 2.53186E-05 | 1.1747 | immune response [GO:0006955] |
| LNB | VM | A0A075B6K4 | IGLV3-10 | 2.389E-07 | 1.8546 | immune response [GO:0006955] |
| LNB | VM | A0A0B4J1Y8 | IGLV9-49 | 2.39649E-05 | 1.6125 | immune response [GO:0006955] |
| LNB | VM | P01591 | JCHAIN | 5.31028E-05 | 1.5848 | immune response [GO:0006955] |
| LNB | VM | P01717 | IGLV3-25 | 1.79486E-09 | 1.9561 | immune response [GO:0006955] |
| LNB | VM | P01871 | IGHM | 1.9352E-05 | 1.7966 | adaptive immune response [GO:0002250] |
| LNB | VM | P06702 | S100A9 | 0.018078416 | -1.3447 | innate immune response [GO:0045087] |
| LNB | VM | P06733 | ENO1 | 0.000228589 | -1.0312 | other |
| LNB | VM | P09603 | CSF1 | 7.25579E-09 | -1.2365 | innate immune response [GO:0045087] |
| LNB | VM | Q9Y6R7 | FCGBP | 2.46493E-05 | 1.3237 | other |
| LNB | control | A0A075B6I0 | IGLV8-61 | 0.000309165 | 1.1506 | immune response [GO:0006955] |
| LNB | control | A0A075B6J9 | IGLV2-18 | 7.96928E-05 | 1.0590 | immune response [GO:0006955] |
| LNB | control | A0A075B6K0 | IGLV3-16 | 2.15317E-06 | 1.3034 | immune response [GO:0006955] |
| LNB | control | A0A075B6K4 | IGLV3-10 | 5.54358E-10 | 2.1034 | immune response [GO:0006955] |
| LNB | control | A0A075B6P5;P01615 | IGKV2-28;IGKV2D-28 | 3.38899E-06 | 1.1638 | immune response [GO:0006955] |
| LNB | control | A0A0B4J1V6 | IGHV3-73 | 6.13826E-06 | 1.0549 | immunoglobulin mediated immune response [GO:0016064] |
| LNB | control | A0A0B4J1Y8 | IGLV9-49 | 8.2725E-05 | 1.4784 | immune response [GO:0006955] |
| LNB | control | A0A0C4DH24 | IGKV6-21 | 4.49599E-07 | 1.1364 | immune response [GO:0006955] |
| LNB | control | A0A0C4DH31 | IGHV1-18 | 8.48379E-07 | 1.1144 | immunoglobulin mediated immune response [GO:0016064] |
| LNB | control | A0AAG2UUW0 | APOB | 2.2969E-05 | 1.4527 | other |
| LNB | control | B9A064 | IGLL5 | 1.27217E-06 | 1.0648 | immunoglobulin mediated immune response [GO:0016064] |
| LNB | control | O43866 | CD5L | 4.78052E-05 | 1.3132 | inflammatory response [GO:0006954] |
| LNB | control | P01591 | JCHAIN | 4.9942E-10 | 2.7718 | immune response [GO:0006955] |
| LNB | control | P01701 | IGLV1-51 | 1.44117E-05 | 1.1102 | immune response [GO:0006955] |
| LNB | control | P01709 | IGLV2-8 | 6.36568E-05 | 1.1339 | immune response [GO:0006955] |
| LNB | control | P01717 | IGLV3-25 | 1.15989E-08 | 1.9521 | immune response [GO:0006955] |
| LNB | control | P01871 | IGHM | 6.82279E-11 | 3.0667 | adaptive immune response [GO:0002250] |
| LNB | control | P02741 | CRP | 0.00572022 | -1.0117 | innate immune response [GO:0045087] |
| LNB | control | P02743 | APCS | 3.27736E-05 | 1.3845 | innate immune response [GO:0045087] |
| LNB | control | P02746 | C1QB | 4.73158E-08 | 1.0347 | innate immune response [GO:0045087] |
| LNB | control | P04003 | C4BPA | 9.4724E-06 | 1.2708 | innate immune response [GO:0045087] |
| LNB | control | P05408 | SCG5 | 8.14822E-08 | -1.1644 | neuropeptide signaling pathway [GO:0007218] |
| LNB | control | P07737 | PFN1 | 1.15996E-06 | 1.3794 | protein stabilization [GO:0050821] |
| LNB | control | P08670 | VIM | 6.31901E-05 | 1.2797 | positive regulation of gene expression [GO:0010628] |
| LNB | control | P10645 | CHGA | 1.49404E-07 | -1.5734 | innate immune response [GO:0045087] |
| LNB | control | P13796 | LCP1 | 1.73629E-08 | 1.4317 | cell migration [GO:0016477] |
| LNB | control | P23582 | NPPC | 3.57234E-09 | -1.2180 | angiogenesis [GO:0001525] |
| LNB | control | P26038 | MSN | 3.60631E-07 | 1.0384 | positive regulation of gene expression [GO:0010628] |
| LNB | control | P31146 | CORO1A | 2.56422E-07 | 1.4438 | innate immune response [GO:0045087] |
| LNB | control | P60709 | ACTB | 5.28812E-07 | 1.5228 | positive regulation of cell population proliferation [GO:0008284] |
| LNB | control | P61626 | LYZ | 8.14426E-05 | 1.0573 | inflammatory response [GO:0006954] |
| LNB | control | P62736;P63267 | ACTA2;ACTG2 | 6.07352E-07 | 1.4786 | positive regulation of gene expression [GO:0010628] |
| LNB | control | P62805 | H4C1 | 8.61539E-06 | 1.8339 | other |
| LNB | control | P62937 | PPIA | 1.83577E-05 | 1.0059 | apoptotic process [GO:0006915] |
| LNB | control | P63104 | YWHAZ | 3.20261E-07 | 1.0842 | signal transduction [GO:0007165] |
| LNB | control | Q562R1 | ACTBL2 | 1.09819E-07 | 1.6610 | axonogenesis [GO:0007409] |
| LNB | control | Q99574 | SERPINI1 | 1.18025E-06 | -1.2106 | central nervous system development [GO:0007417] |
| LNB | control | Q9H1Z8 | ECRG4 | 6.89432E-09 | -1.0394 | central nervous system development [GO:0007417] |
| LNB | control | Q9H299 | SH3BGRL3 | 7.23881E-07 | 1.0751 | other |
| LNB | control | Q9NZK5 | ADA2 | 1.76646E-08 | 1.2921 | other |
| LNB | control | Q9Y6R7 | FCGBP | 5.22605E-08 | 1.4716 | other |


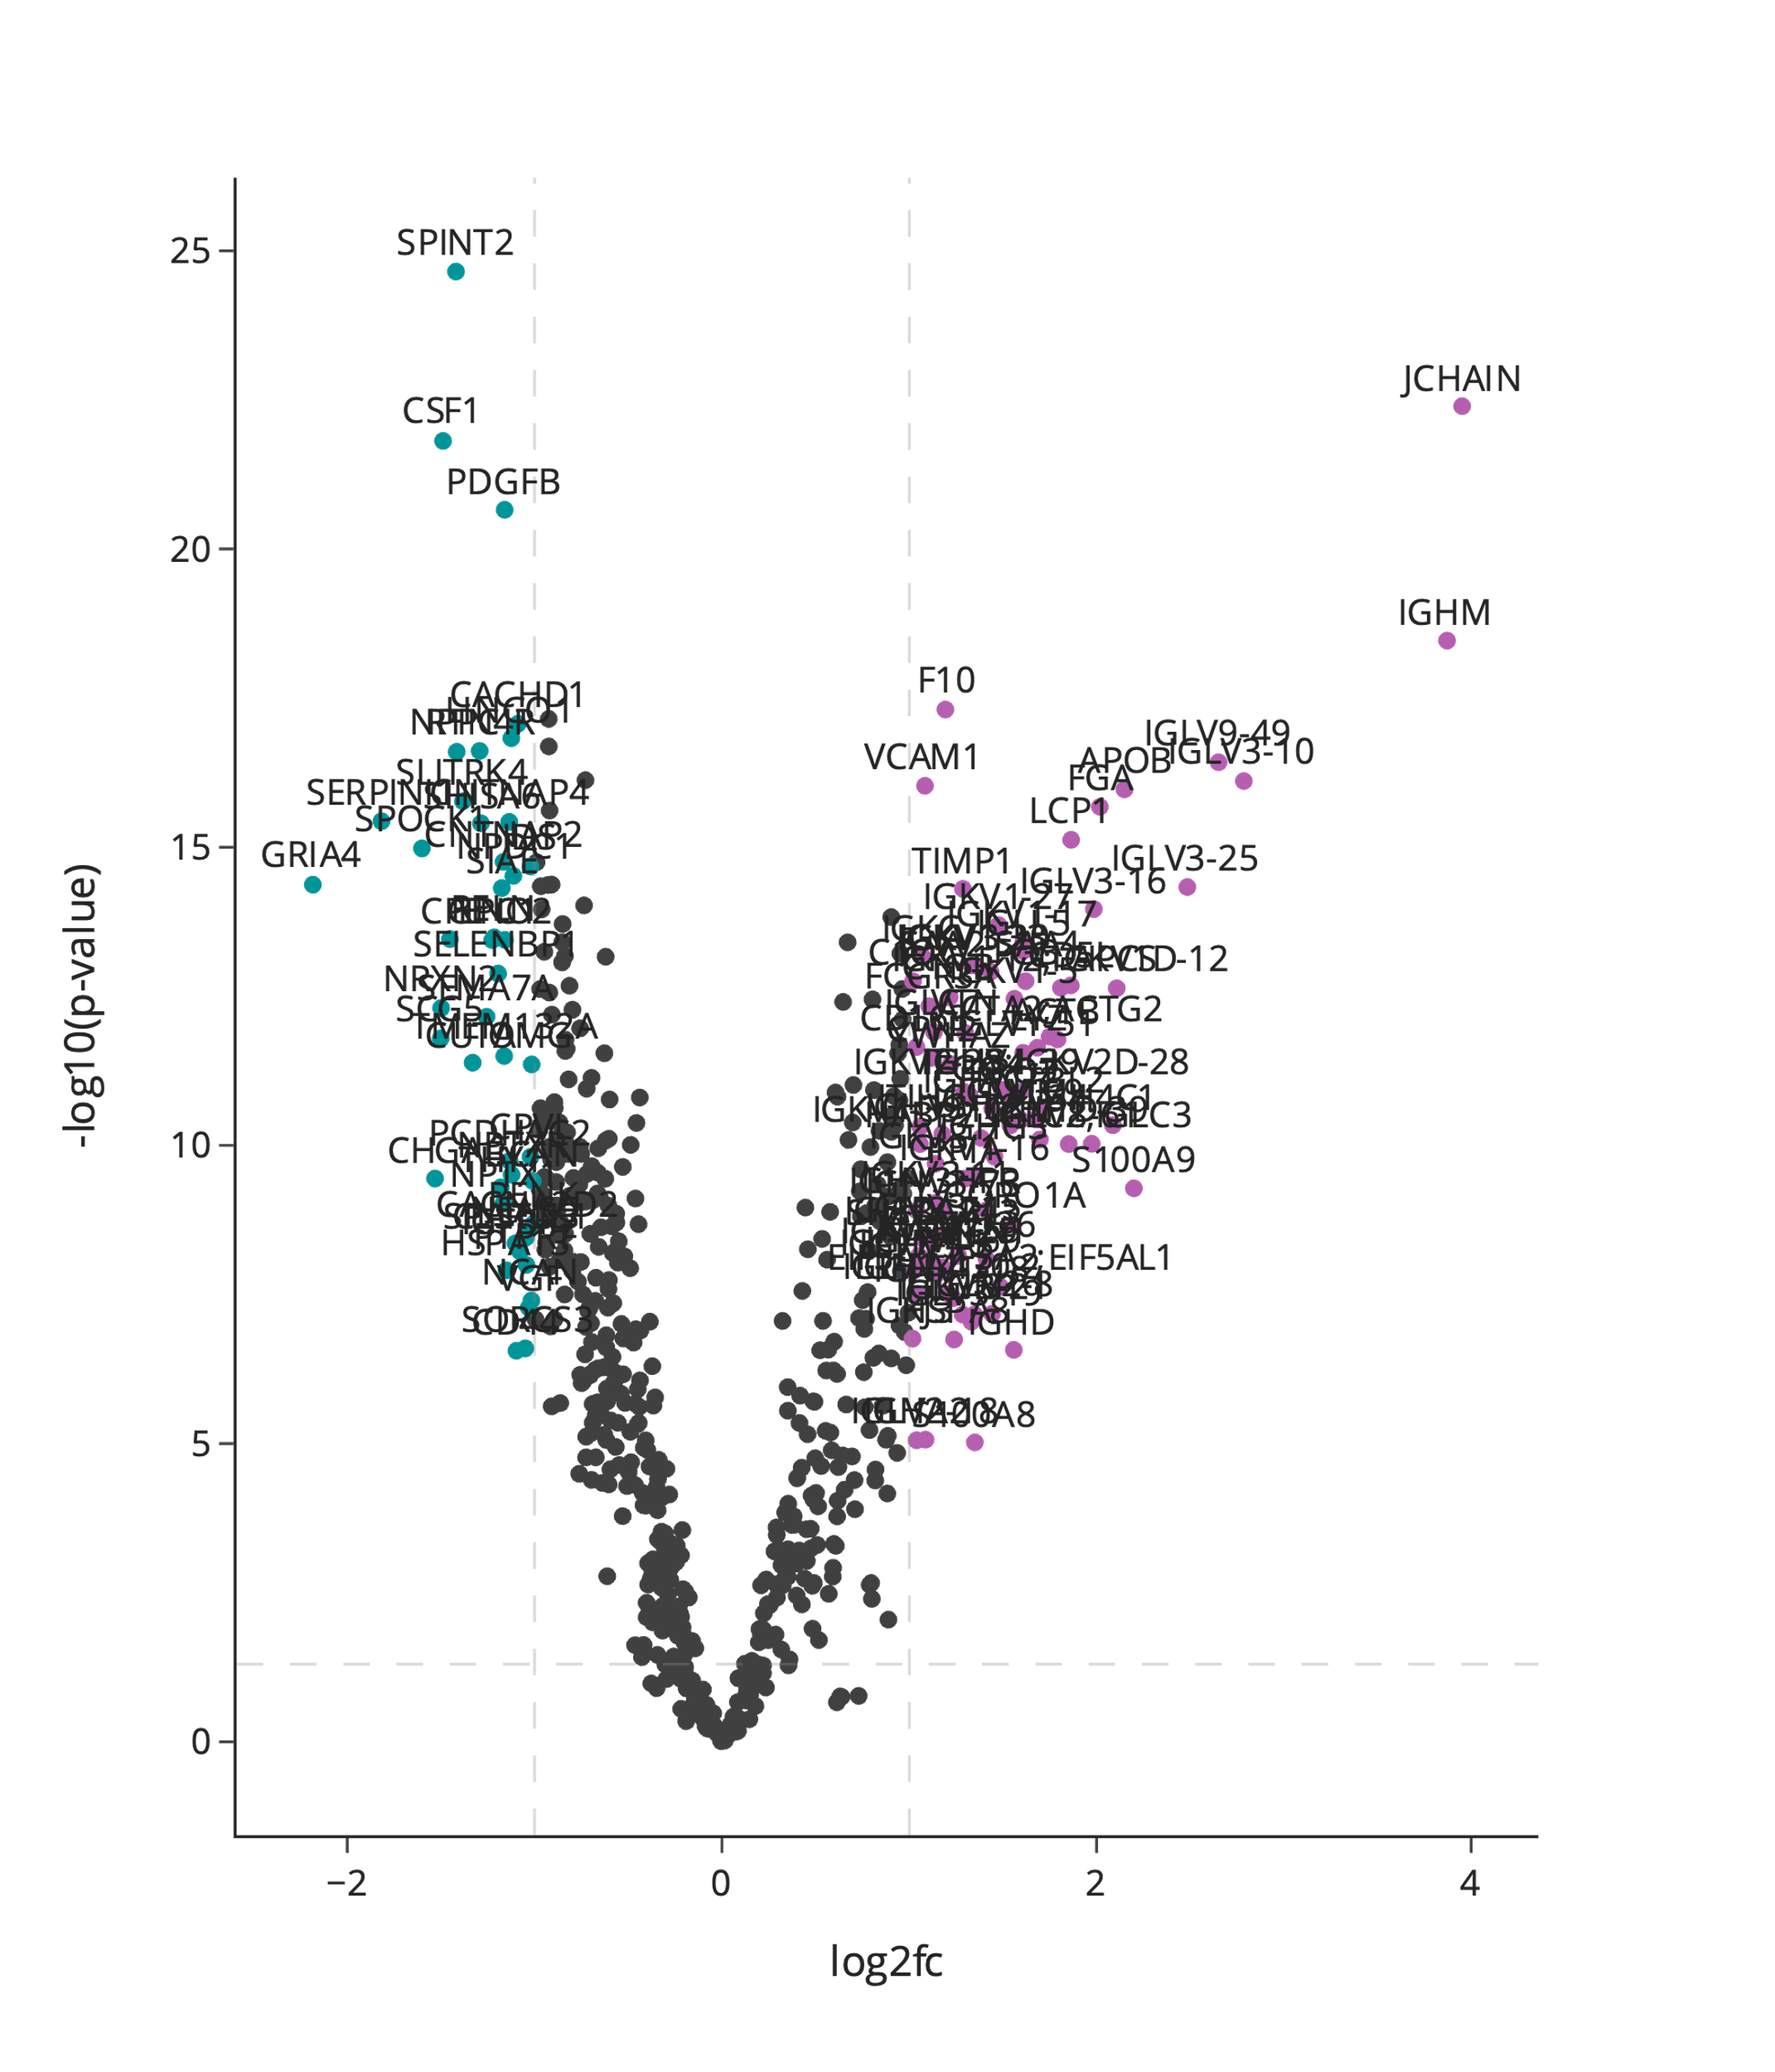


**Figure 2** Volcano plot highlighting protein differences between Lyme neuroborreliosis (LNB) and controls in the cerebrospinal fluid validation cohort. Each point represents a protein, the colour purple represents upregulated proteins with a log2 fold change (FC) larger than 1, the colour blue represents downregulated proteins with a log2 fold smaller larger than -1 and the colour grey represents proteins with a log2 fold change between -1 and 1 or non-significant proteins. X-axis depicts log2 fold change and y-axis depicts the log 10 adjusted p-value. Horizontal dashed lines represent the significance threshold after multiple hypothesis correction at p=0.05. Vertical dashed lines represent large log2 fold changes: above 1 or below -1.


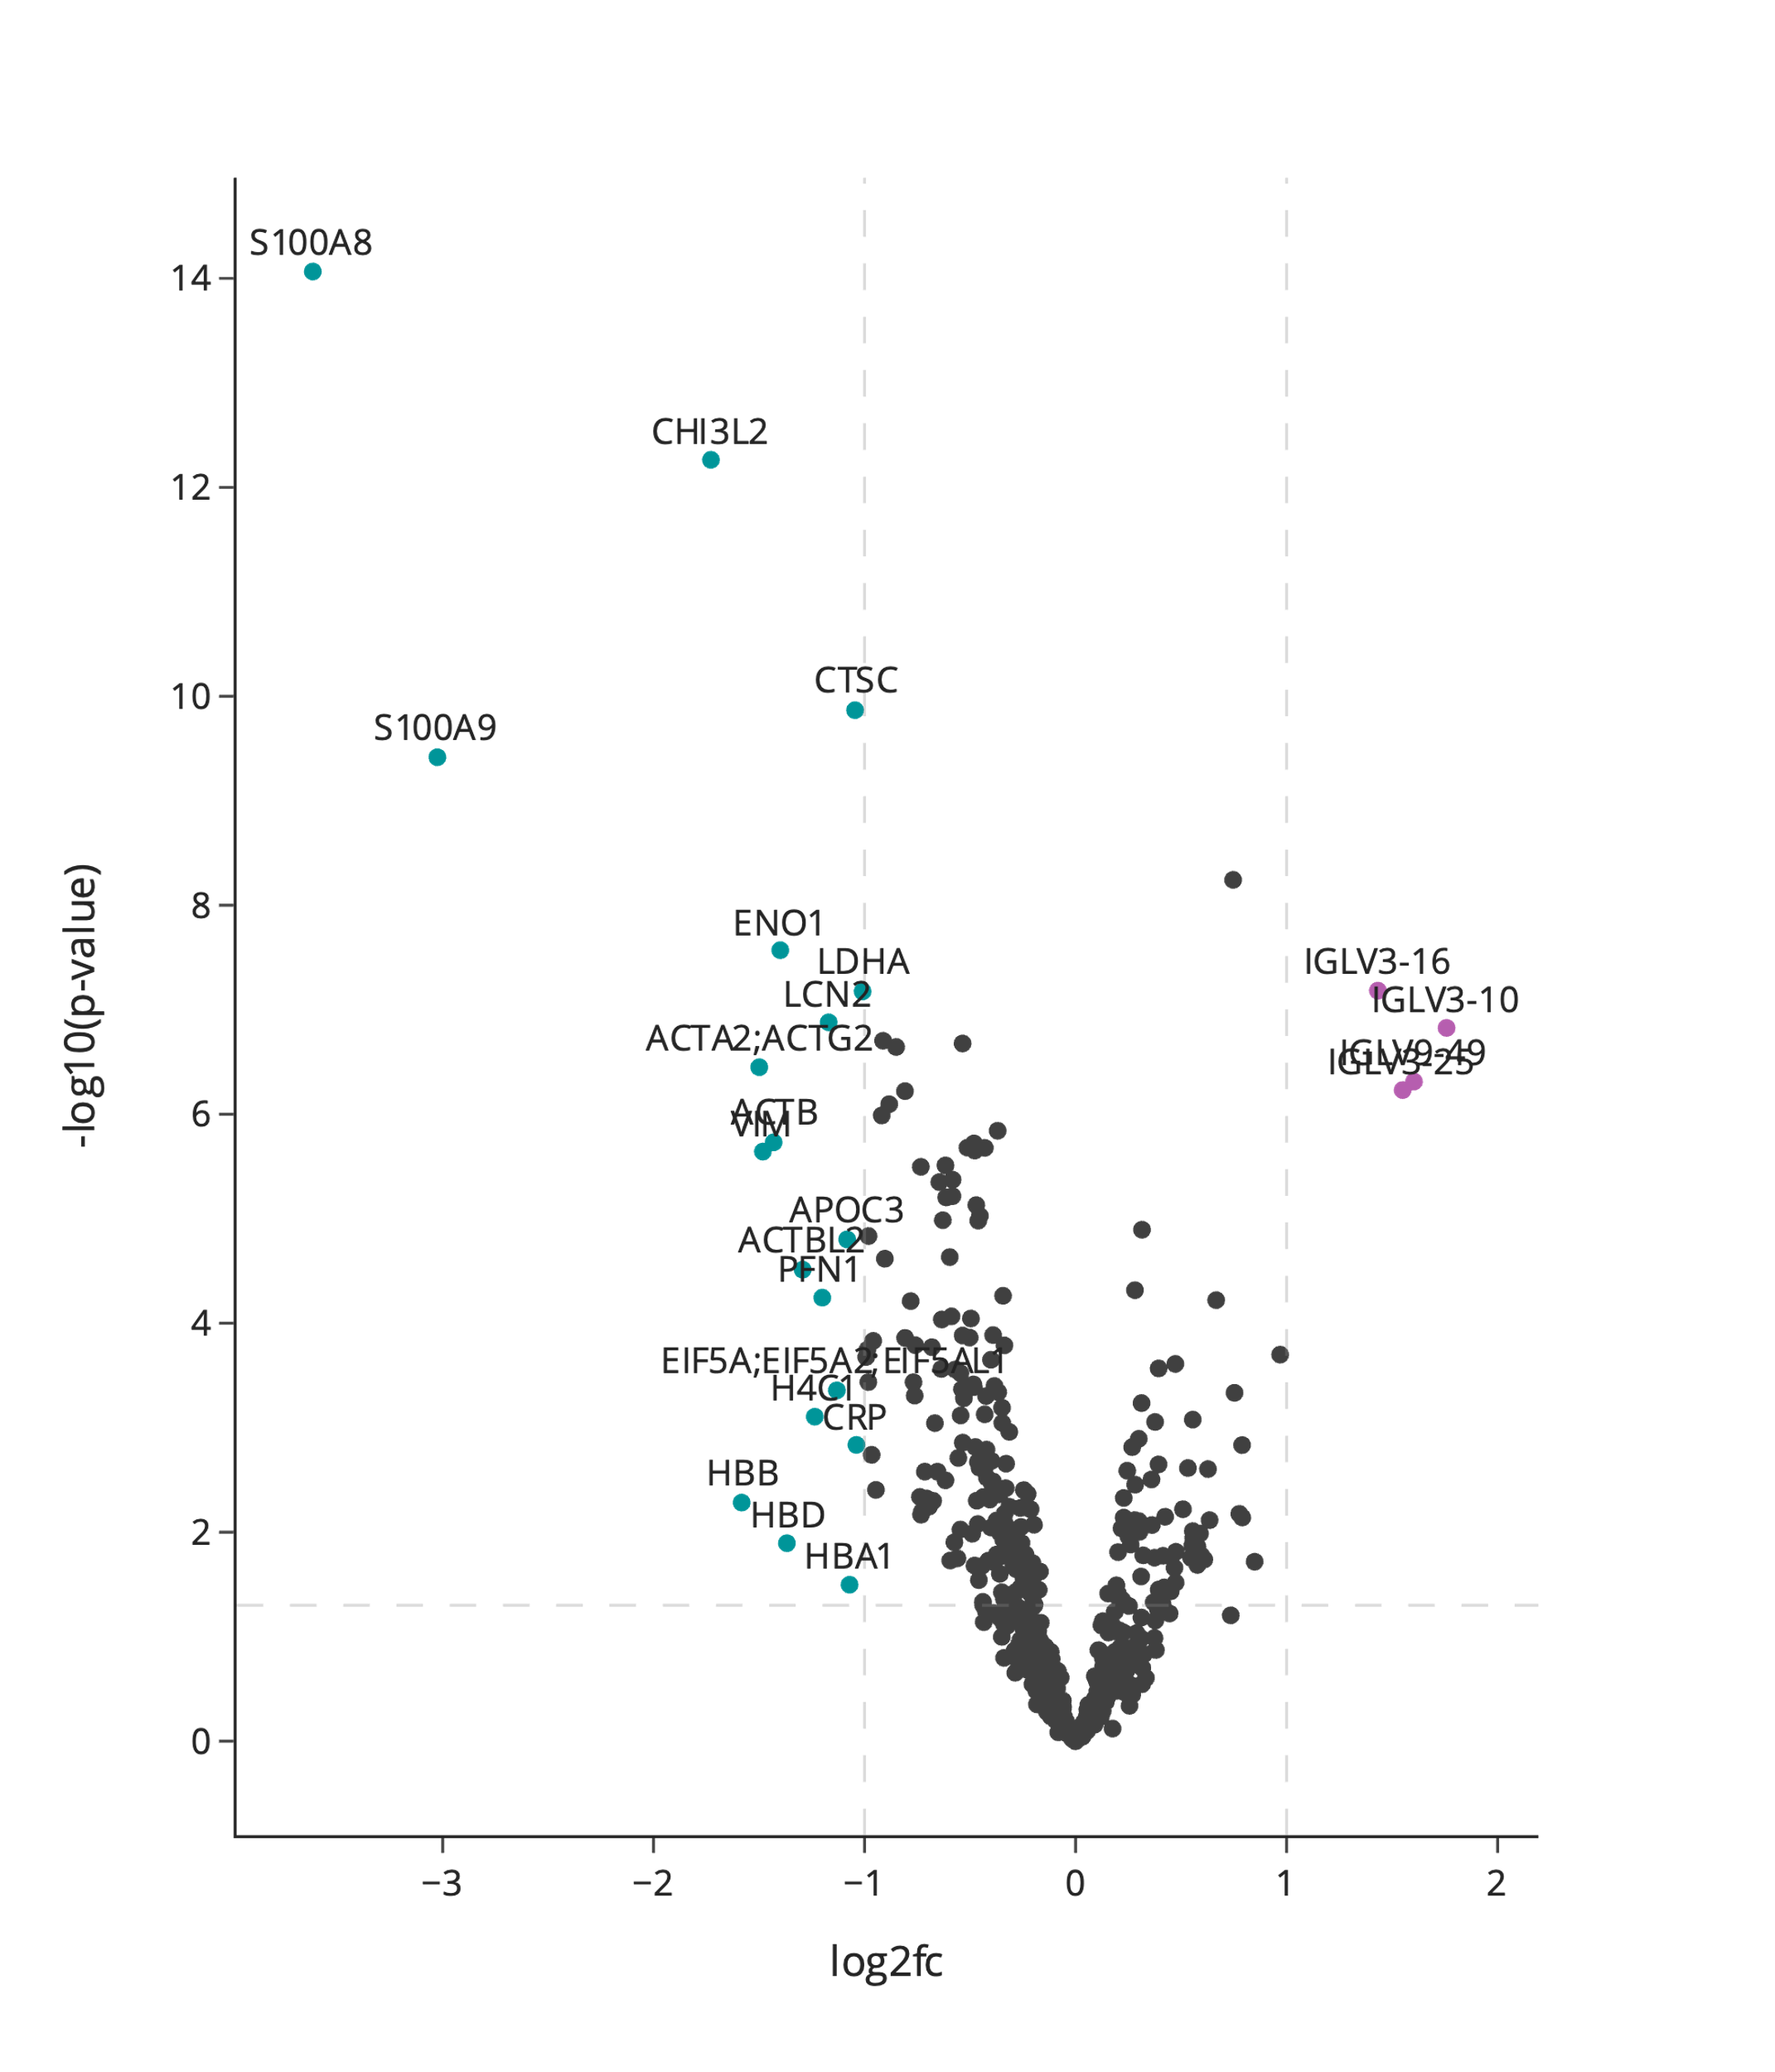


**Figure 3** Volcano plot highlighting protein differences between Lyme neuroborreliosis (LNB) and viral meningitis (VM) in the cerebrospinal fluid validation cohort. Each point represents a protein, the colour purple represents upregulated proteins with a log2 fold change (FC) larger than 1, the colour blue represents downregulated proteins with a log2 fold smaller larger than -1 and the colour grey represents proteins with a log2 fold change between -1 and 1 or non-significant proteins. X-axis depicts log2 fold change and y-axis depicts the log 10 adjusted p-value. Horizontal dashed lines represent the significance threshold after multiple hypothesis correction at p=0.05. Vertical dashed lines represent large log2 fold changes: above 1 or below -1.


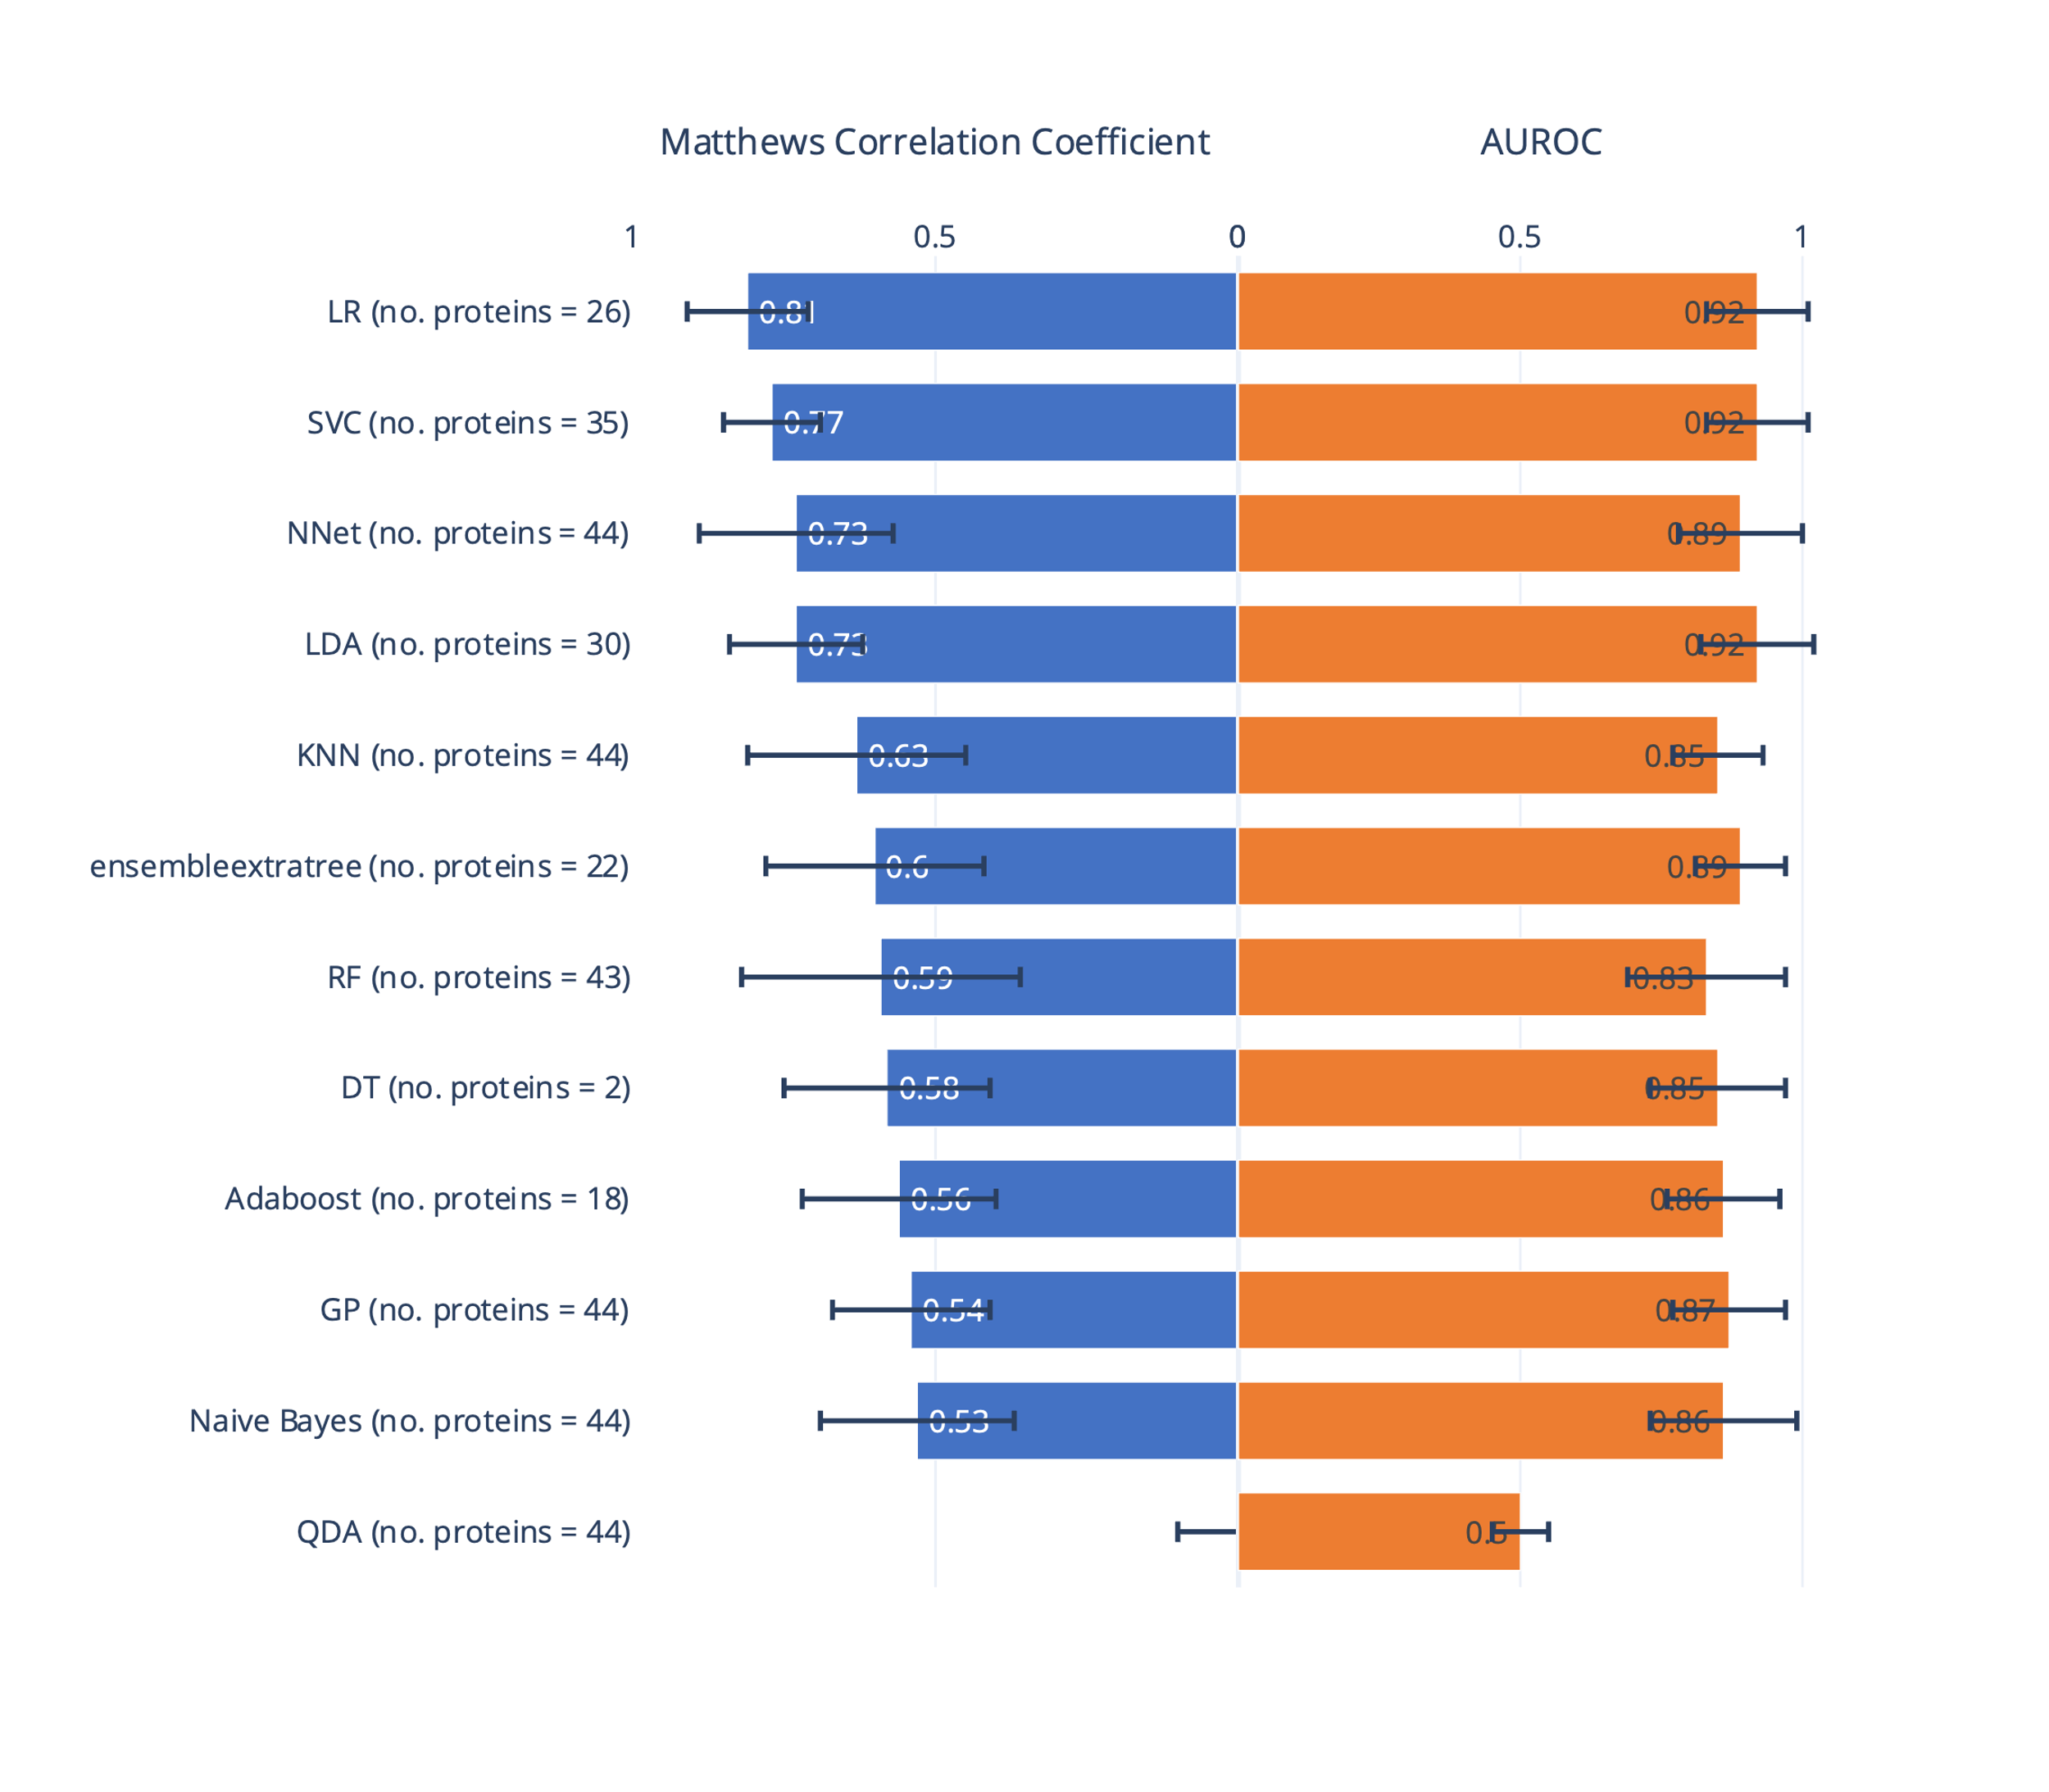


**Figure 4** Output of the cross-validation grid search of algorithms, hyperparameters, and the number of proteins is displayed as the area under the receiver operating characteristic curve (AUROC) and Matthews Correlation Coefficient (MCC) from the predictions on the test sets. The model was trained to classify Lyme neuroborreliosis and viral meningitis. The number of proteins used in each model is shown to the right. The error bars represent the standard deviation across the 5-fold cross-validation runs.


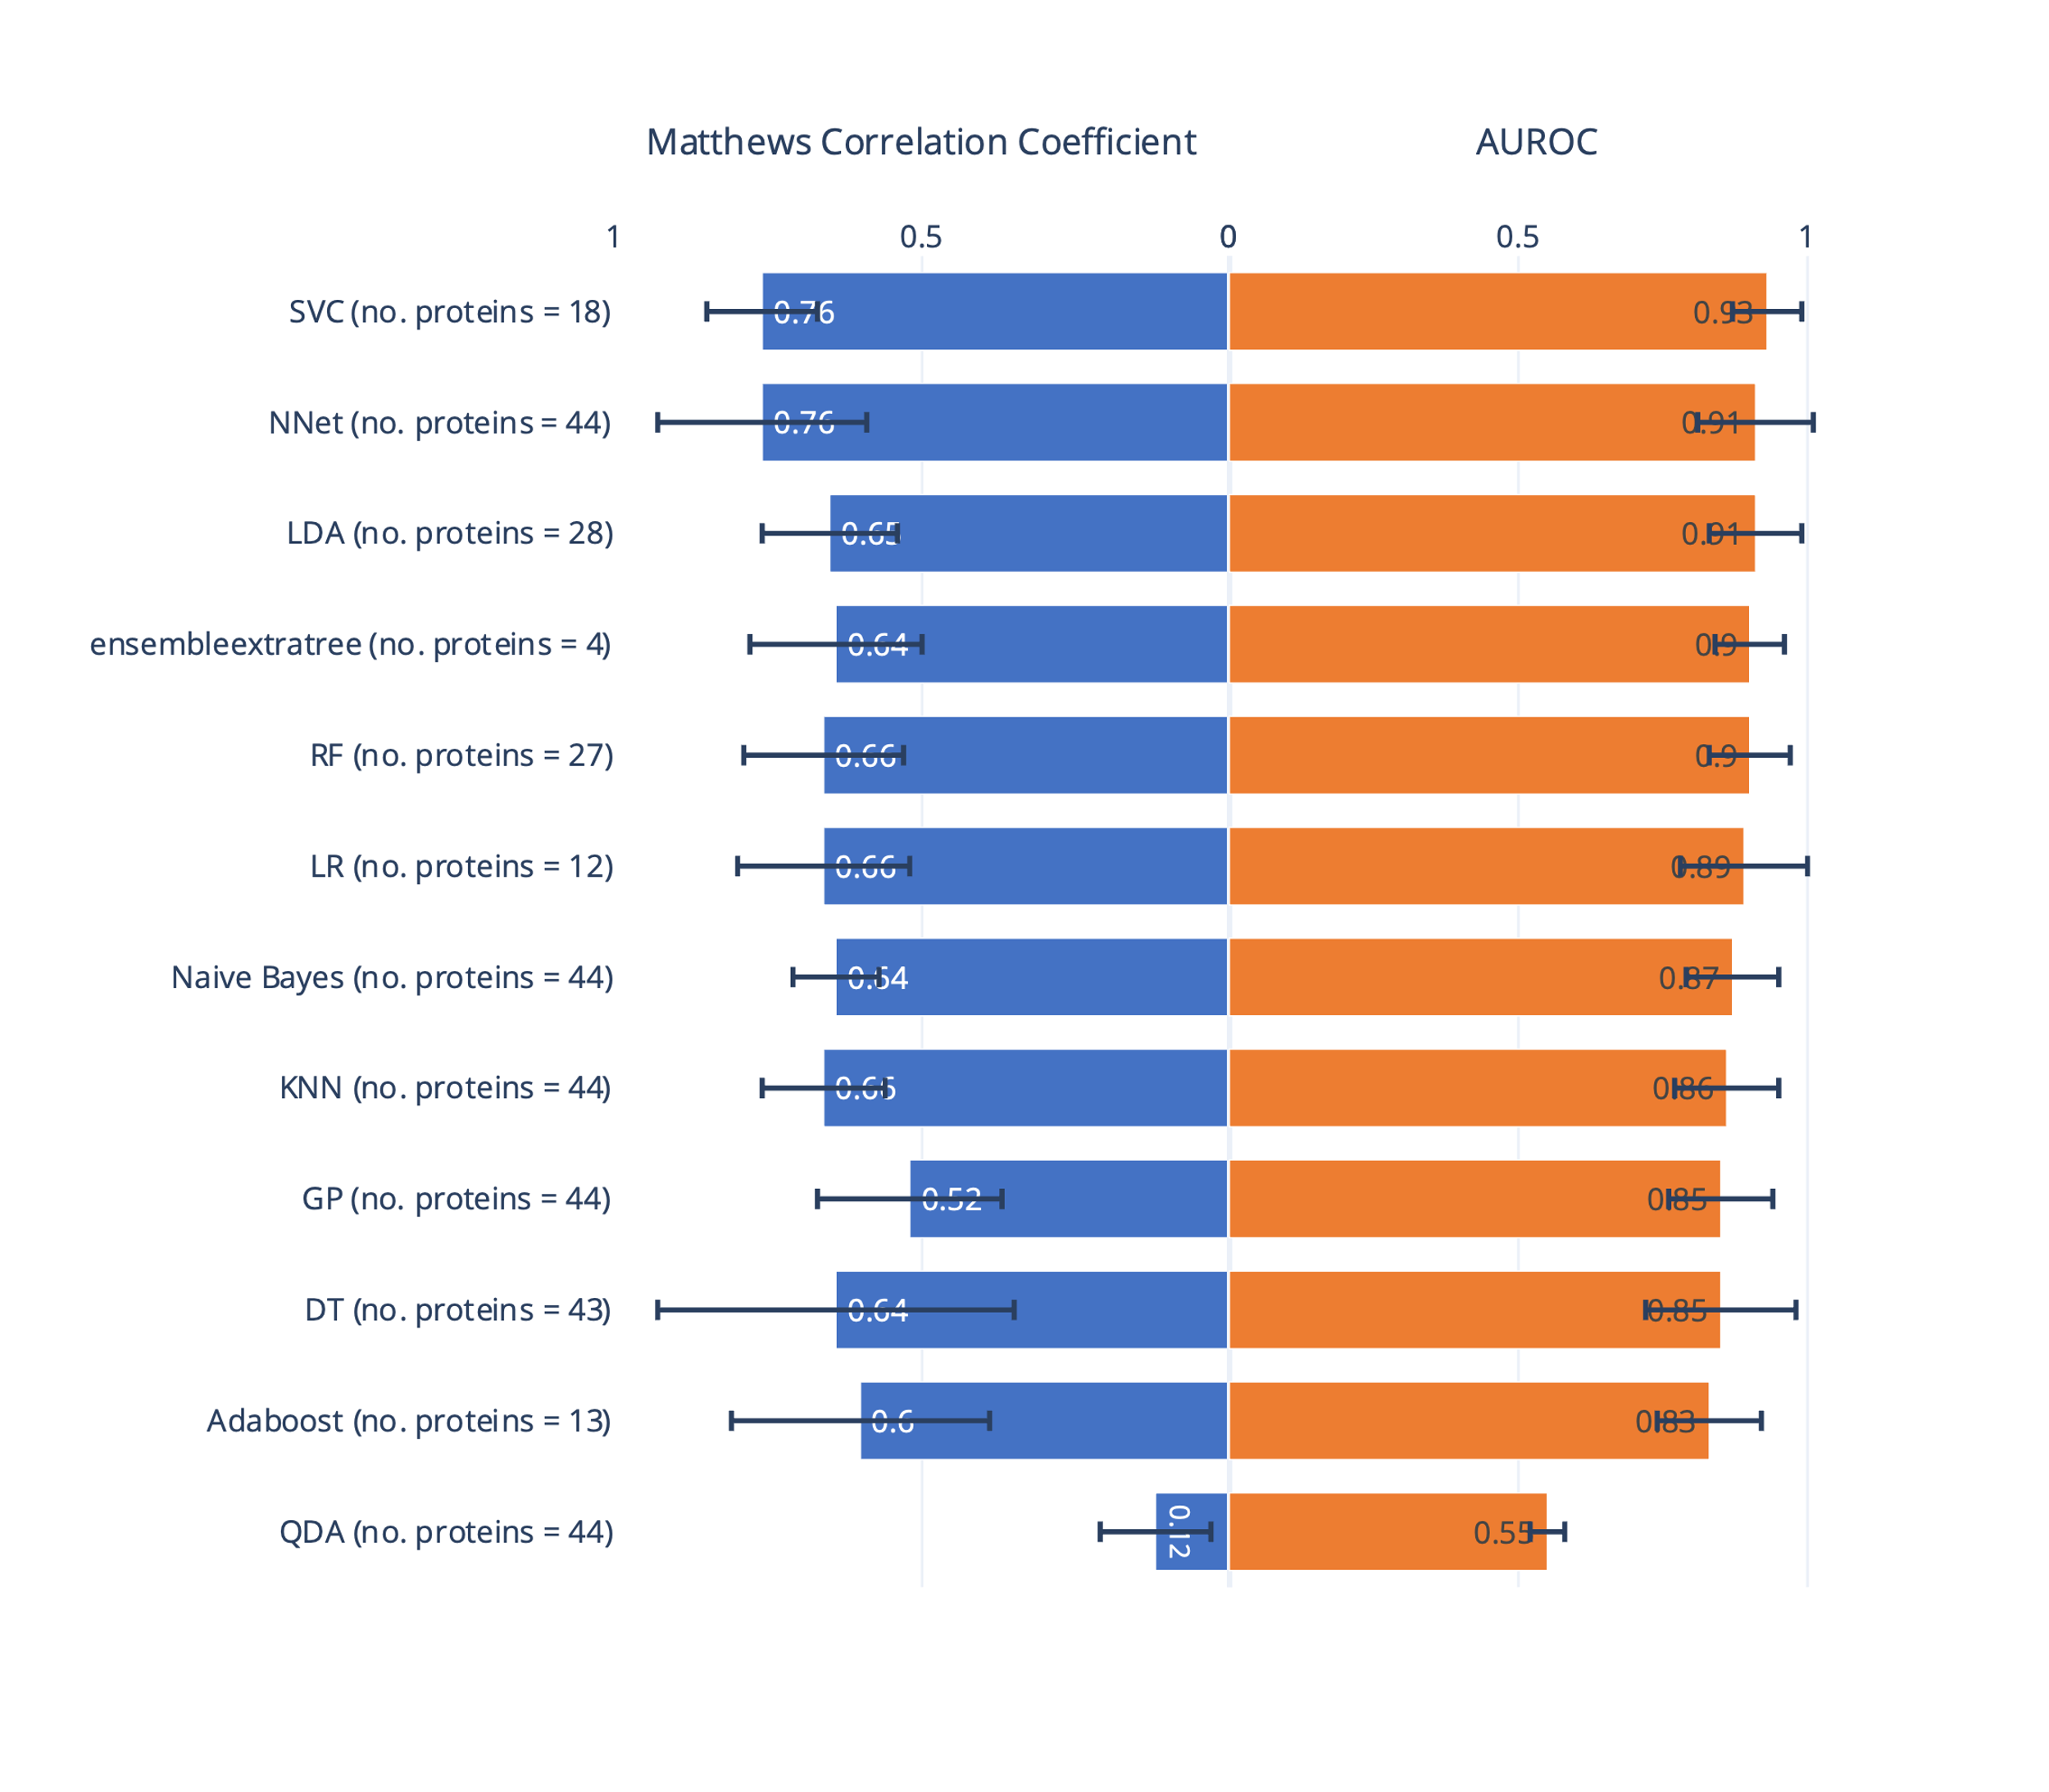


**Figure 5** Output of the cross-validation grid search of algorithms, hyperparameters, and the number of proteins is displayed as the area under the receiver operating characteristic curve (AUROC) and Matthews Correlation Coefficient (MCC) from the predictions on the test sets. The model was trained to classify Lyme neuroborreliosis and controls. The number of proteins used in each model is shown to the right. The error bars represent the standard deviation across the 5-fold cross-validation runs.


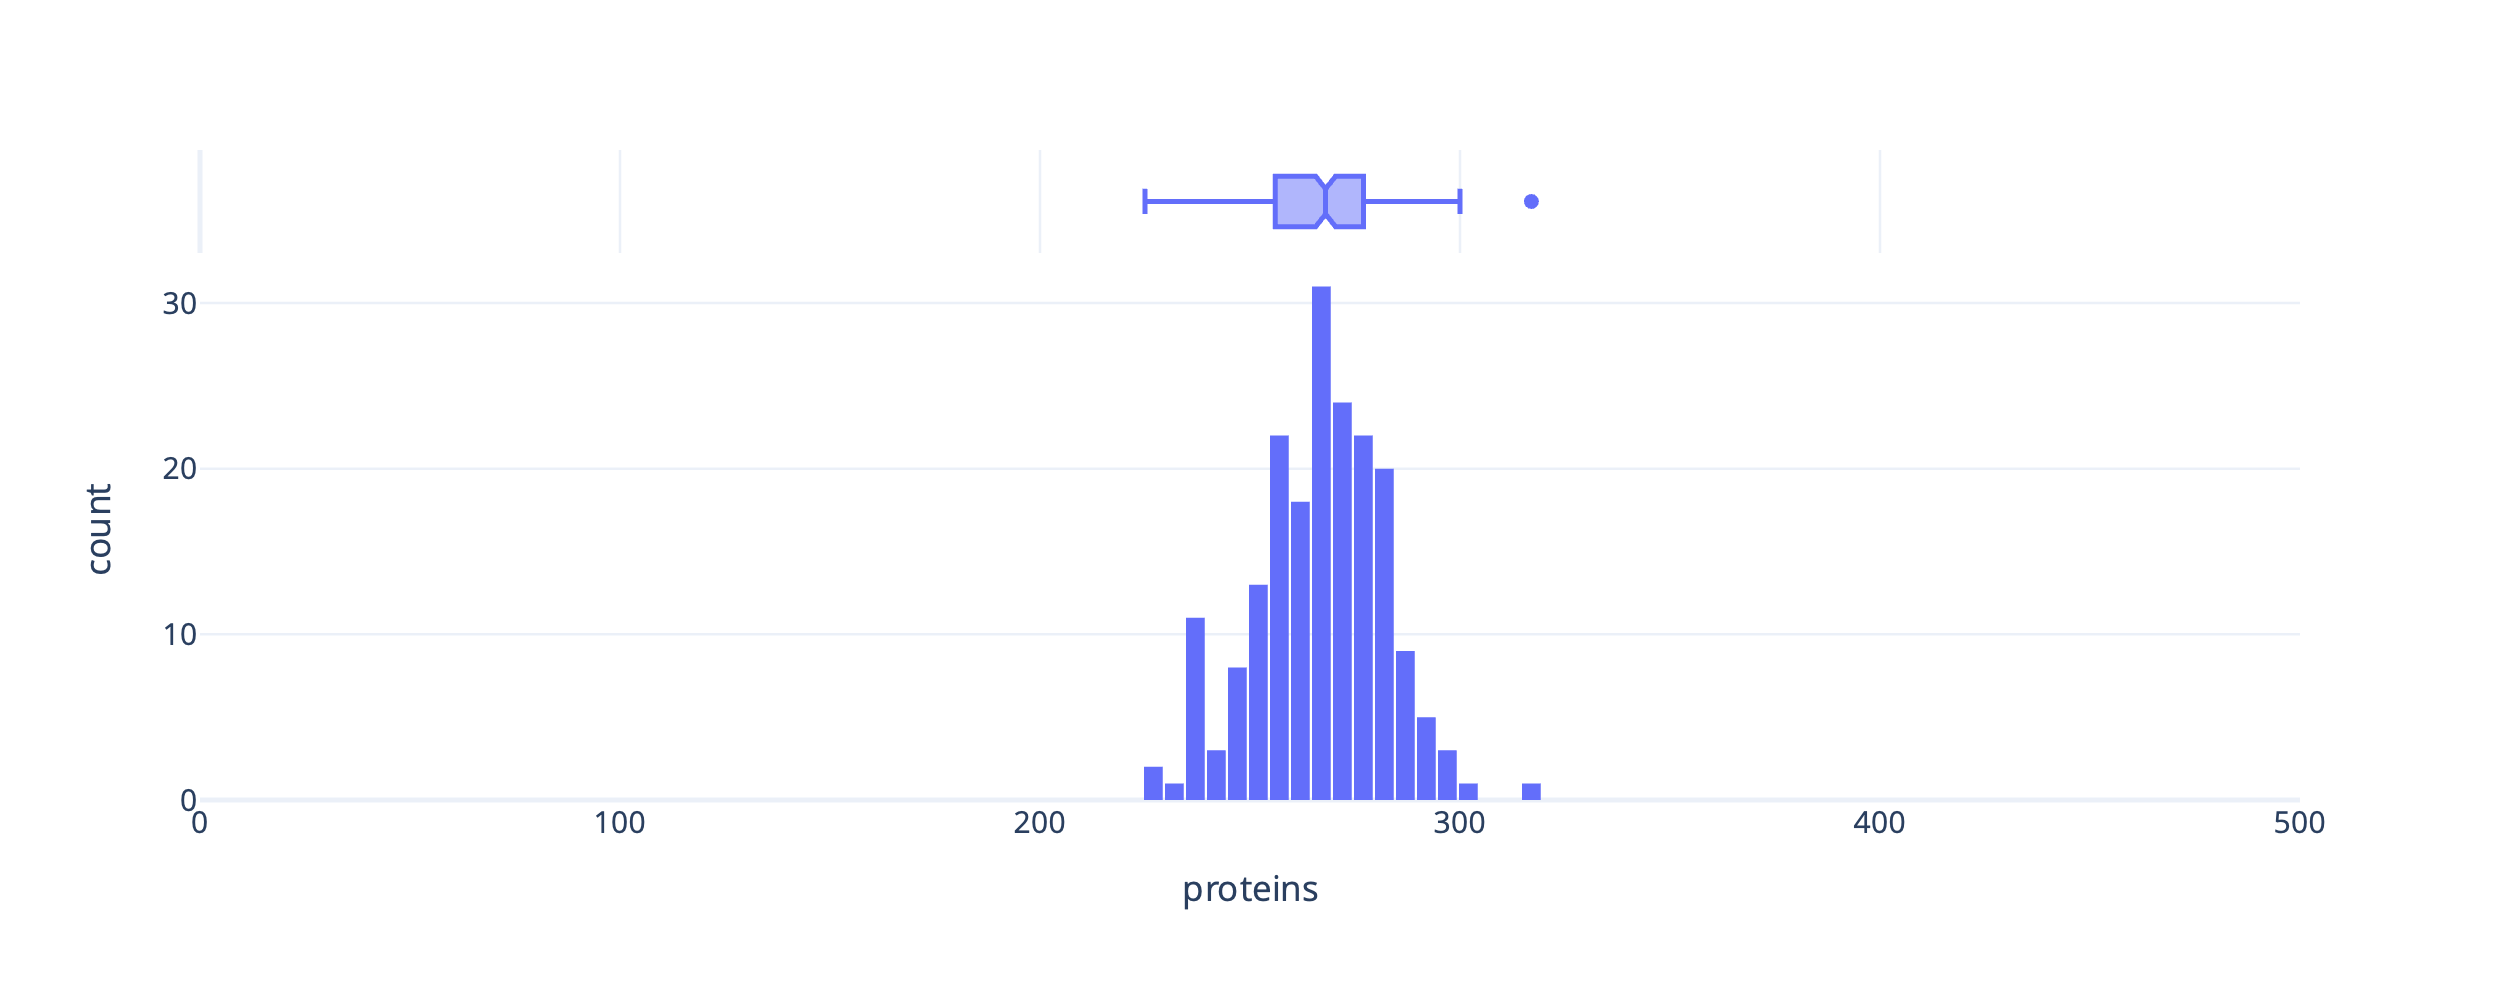


**Figure 6** Histogram and marginal boxplot of the number of proteins measured in each plasma sample. Samples with low protein content were removed from analysis. The cutoff for low protein count was defined by a cutoff of 1.5IQR from the 25th quantile in the boxplot (230 proteins).

**Table 2** Overview of proteins with significant different protein levels in plasma samples of patients with Lyme neuroborreliosis (LNB) compared to viral meningitis (VM) or controls. The column “Protein.Group” represent Uniprot identifiers. The magnitude of the change is represented by log(2) fold changes in the column “log2FC”. Log2FC is positive when the protein level is higher in LNB and negative when the protein level is higher in VM or controls. Gene Ontology terms and identifiers are included in the right column.

| group1 | group2 | Protein.Group | Genes | Adjusted p-value | log2FC | Gene Ontology |
| --- | --- | --- | --- | --- | --- | --- |
| LNB | VM | A0A075B6H7 | IGKV3-7 | 0.00856 | -0.35165 | immune response [GO:0006955] |
| LNB | VM | A0A075B6R9;A0A0C4DH68 | IGKV2-24;IGKV2D-24 | 0.04519 | -0.39838 | immune response [GO:0006955] |
| LNB | VM | A0A075B6S5 | IGKV1-27 | 0.04927 | -0.26167 | immune response [GO:0006955] |
| LNB | VM | A0A0B4J1X5 | IGHV3-74 | 0.03026 | -0.30631 | immunoglobulin mediated immune response [GO:0016064] |
| LNB | VM | A0A0C4DH24 | IGKV6-21 | 0.03736 | -0.38677 | immune response [GO:0006955] |
| LNB | VM | A0A0C4DH31 | IGHV1-18 | 0.01302 | -0.40935 | immunoglobulin mediated immune response [GO:0016064] |
| LNB | VM | A0A0C4DH36 | IGHV3-38 | 0.01744 | -0.35707 | immunoglobulin mediated immune response [GO:0016064] |
| LNB | VM | A0A0J9YXX1 | IGHV5-10-1 | 0.01870 | 1.13650 | immunoglobulin mediated immune response [GO:0016064] |
| LNB | VM | A0AAG2TVE0 | A0AAG2TVE0 | 0.04939 | 0.66621 |  |
| LNB | VM | O75636 | FCN3 | 0.03694 | 0.19080 | proteolysis [GO:0006508] |
| LNB | VM | O75882 | ATRN | 0.02213 | 0.15305 | inflammatory response [GO:0006954] |
| LNB | VM | O95445 | APOM | 0.04778 | 0.18697 | high-density lipoprotein particle remodeling [GO:0034375] |
| LNB | VM | P00488 | F13A1 | 0.02867 | 0.24636 | blood coagulation [GO:0007596] |
| LNB | VM | P01602 | IGKV1-5 | 0.00037 | -0.46912 | immune response [GO:0006955] |
| LNB | VM | P01619 | IGKV3-20 | 0.00577 | -0.37231 | immune response [GO:0006955] |
| LNB | VM | P01780 | IGHV3-7 | 0.00630 | -0.30620 | immune response [GO:0006955] |
| LNB | VM | P01834 | IGKC | 0.04835 | -0.25036 | immune response [GO:0006955] |
| LNB | VM | P01857 | IGHG1 | 0.00002 | -0.35600 | adaptive immune response [GO:0002250] |
| LNB | VM | P02649 | APOE | 0.02676 | 0.25026 | cholesterol metabolic process [GO:0008203] |
| LNB | VM | P02654 | APOC1 | 0.01812 | 0.25454 | cholesterol metabolic process [GO:0008203] |
| LNB | VM | P02656 | APOC3 | 0.00010 | 0.49565 | high-density lipoprotein particle remodeling [GO:0034375] |
| LNB | VM | P02671 | FGA | 0.02274 | -0.19636 | adaptive immune response [GO:0002250] |
| LNB | VM | P02675 | FGB | 0.01290 | -0.28546 | adaptive immune response [GO:0002250] |
| LNB | VM | P02679 | FGG | 0.01150 | -0.34442 | fibrinolysis [GO:0042730] |
| LNB | VM | P02741 | CRP | 0.01919 | -1.17647 | innate immune response [GO:0045087] |
| LNB | VM | P02746 | C1QB | 0.04063 | -0.16595 | innate immune response [GO:0045087] |
| LNB | VM | P02747 | C1QC | 0.00153 | -0.23470 | immune response [GO:0006955] |
| LNB | VM | P02748 | C9 | 0.00234 | -0.37041 | complement activation, classical pathway [GO:0006958] |
| LNB | VM | P02750 | LRG1 | 0.00115 | -0.49298 | positive regulation of angiogenesis [GO:0045766] |
| LNB | VM | P02751 | FN1 | 0.00439 | -0.52337 | acute-phase response [GO:0006953] |
| LNB | VM | P02753 | RBP4 | 0.02769 | 0.23883 | other |
| LNB | VM | P02765 | AHSG | 0.03292 | -0.20536 | acute-phase response [GO:0006953] |
| LNB | VM | P02790 | HPX | 0.00351 | 0.18942 | intracellular iron ion homeostasis [GO:0006879] |
| LNB | VM | P03951 | F11 | 0.04411 | -0.17015 | blood coagulation [GO:0007596] |
| LNB | VM | P04004 | VTN | 0.00231 | -0.20619 | immune response [GO:0006955] |
| LNB | VM | P04070 | PROC | 0.02816 | 0.20194 | blood coagulation [GO:0007596] |
| LNB | VM | P04275 | VWF | 0.00001 | -1.39211 | blood coagulation [GO:0007596] |
| LNB | VM | P04433 | IGKV3-11 | 0.03232 | -0.24214 | immune response [GO:0006955] |
| LNB | VM | P05090 | APOD | 0.00952 | 0.34954 | angiogenesis [GO:0001525] |
| LNB | VM | P05109 | S100A8 | 0.03735 | -0.62225 | innate immune response [GO:0045087] |
| LNB | VM | P05154 | SERPINA5 | 0.00009 | 0.43218 | lipid transport [GO:0006869] |
| LNB | VM | P05155 | SERPING1 | 0.02323 | 0.17273 | innate immune response [GO:0045087] |
| LNB | VM | P05546 | SERPIND1 | 0.00690 | 0.21704 | blood coagulation [GO:0007596] |
| LNB | VM | P06312 | IGKV4-1 | 0.00694 | -0.32065 | immune response [GO:0006955] |
| LNB | VM | P06681 | C2 | 0.00905 | -0.12792 | innate immune response [GO:0045087] |
| LNB | VM | P06702 | S100A9 | 0.00011 | -1.02138 | innate immune response [GO:0045087] |
| LNB | VM | P06727 | APOA4 | 0.00069 | 0.47736 | cholesterol metabolic process [GO:0008203] |
| LNB | VM | P07195 | LDHB | 0.00029 | 0.45285 | other |
| LNB | VM | P07225 | PROS1 | 0.00001 | 0.25489 | blood coagulation [GO:0007596] |
| LNB | VM | P07737 | PFN1 | 0.02297 | 0.87449 | protein stabilization [GO:0050821] |
| LNB | VM | P08185 | SERPINA6 | 0.00647 | -0.23854 | other |
| LNB | VM | P08571 | CD14 | 0.00110 | -0.35763 | innate immune response [GO:0045087] |
| LNB | VM | P0DJI8 | SAA1 | 0.00290 | -1.55342 | acute-phase response [GO:0006953] |
| LNB | VM | P12259 | F5 | 0.01711 | -0.16784 | blood coagulation [GO:0007596] |
| LNB | VM | P13473 | LAMP2 | 0.00500 | -0.29392 | protein stabilization [GO:0050821] |
| LNB | VM | P13671 | C6 | 0.00437 | -0.22841 | innate immune response [GO:0045087] |
| LNB | VM | P14151 | SELL | 0.02676 | -0.27011 | cell adhesion [GO:0007155] |
| LNB | VM | P20742 | PZP | 0.03131 | -0.84446 | other |
| LNB | VM | P24592 | IGFBP6 | 0.02466 | 0.25876 | negative regulation of cell population proliferation [GO:0008285] |
| LNB | VM | P29622 | SERPINA4 | 0.00217 | 0.28261 | other |
| LNB | VM | P35858 | IGFALS | 0.00401 | -0.30860 | cell adhesion [GO:0007155] |
| LNB | VM | P51884 | LUM | 0.00808 | 0.28393 | other |
| LNB | VM | P60709 | ACTB | 0.00368 | 1.30850 | platelet aggregation [GO:0070527] |
| LNB | VM | P80108 | GPLD1 | 0.00196 | 0.26208 | negative regulation of cell population proliferation [GO:0008285] |
| LNB | VM | Q16610 | ECM1 | 0.01922 | -0.22499 | inflammatory response [GO:0006954] |
| LNB | VM | Q96IY4 | CPB2 | 0.00794 | 0.17087 | blood coagulation [GO:0007596] |
| LNB | VM | Q9NPH3 | IL1RAP | 0.02190 | -0.38014 | immune response [GO:0006955] |
| LNB | VM | Q9NZP8 | C1RL | 0.00146 | -0.19024 | innate immune response [GO:0045087] |
| LNB | control | A0A075B6H7 | IGKV3-7 | 0.00177 | -0.33554 | immune response [GO:0006955] |
| LNB | control | A0A075B6P5;P01615 | IGKV2-28;IGKV2D-28 | 0.01413 | -0.29223 | immune response [GO:0006955] |
| LNB | control | A0A075B6R9;A0A0C4DH68 | IGKV2-24;IGKV2D-24 | 0.00432 | -0.43494 | immune response [GO:0006955] |
| LNB | control | A0A087WW87;P01614 | IGKV2-40;IGKV2D-40 | 0.00049 | -0.49442 | immune response [GO:0006955] |
| LNB | control | A0A0B4J1V0 | IGHV3-15 | 0.01137 | -0.29754 | immunoglobulin mediated immune response [GO:0016064] |
| LNB | control | A0A0B4J1X5 | IGHV3-74 | 0.01247 | -0.31114 | immunoglobulin mediated immune response [GO:0016064] |
| LNB | control | A0A0C4DH25 | IGKV3D-20 | 0.00329 | -0.44289 | immune response [GO:0006955] |
| LNB | control | A0A0C4DH33 | IGHV1-24 | 0.01431 | -0.45928 | immunoglobulin mediated immune response [GO:0016064] |
| LNB | control | A0A0C4DH36 | IGHV3-38 | 0.00167 | -0.44729 | immunoglobulin mediated immune response [GO:0016064] |
| LNB | control | A0A0J9YX35 | IGHV3-64D | 0.01266 | -0.24660 | immunoglobulin mediated immune response [GO:0016064] |
| LNB | control | A0M8Q6 | IGLC7 | 0.02357 | -0.18057 | adaptive immune response [GO:0002250] |
| LNB | control | O75636 | FCN3 | 0.00312 | 0.23870 | proteolysis [GO:0006508] |
| LNB | control | P00488 | F13A1 | 0.00791 | 0.21285 | blood coagulation [GO:0007596] |
| LNB | control | P00734 | F2 | 0.02876 | -0.10192 | blood coagulation [GO:0007596] |
| LNB | control | P00738 | HP | 0.01893 | 0.38625 | acute-phase response [GO:0006953] |
| LNB | control | P00740 | F9 | 0.04619 | 0.09905 | blood coagulation [GO:0007596] |
| LNB | control | P00747 | PLG | 0.00278 | -0.16783 | blood coagulation [GO:0007596] |
| LNB | control | P01011 | SERPINA3 | 0.01873 | 0.15279 | acute-phase response [GO:0006953] |
| LNB | control | P01024 | C3 | 0.00184 | 0.16474 | immune response [GO:0006955] |
| LNB | control | P01031 | C5 | 0.00135 | 0.18593 | complement activation, classical pathway [GO:0006958] |
| LNB | control | P01042 | KNG1 | 0.00865 | -0.10983 | blood coagulation [GO:0007596] |
| LNB | control | P01619 | IGKV3-20 | 0.00009 | -0.40547 | immune response [GO:0006955] |
| LNB | control | P01780 | IGHV3-7 | 0.01094 | -0.30028 | immune response [GO:0006955] |
| LNB | control | P01834 | IGKC | 0.00367 | -0.30026 | immune response [GO:0006955] |
| LNB | control | P01857 | IGHG1 | 0.00007 | -0.32923 | adaptive immune response [GO:0002250] |
| LNB | control | P01861 | IGHG4 | 0.03574 | -0.45341 | adaptive immune response [GO:0002250] |
| LNB | control | P02671 | FGA | 0.03067 | -0.13049 | adaptive immune response [GO:0002250] |
| LNB | control | P02743 | APCS | 0.03289 | 0.20412 | innate immune response [GO:0045087] |
| LNB | control | P02746 | C1QB | 0.02157 | -0.11934 | innate immune response [GO:0045087] |
| LNB | control | P02747 | C1QC | 0.00066 | -0.21374 | immune response [GO:0006955] |
| LNB | control | P02751 | FN1 | 0.00001 | -0.63677 | acute-phase response [GO:0006953] |
| LNB | control | P02765 | AHSG | 0.00000 | -0.40582 | acute-phase response [GO:0006953] |
| LNB | control | P02766 | TTR | 0.02683 | -0.42209 | other |
| LNB | control | P02787 | TF | 0.01237 | -0.16740 | antibacterial humoral response [GO:0019731] |
| LNB | control | P02790 | HPX | 0.00311 | 0.15382 | intracellular iron ion homeostasis [GO:0006879] |
| LNB | control | P03951 | F11 | 0.04714 | -0.12687 | blood coagulation [GO:0007596] |
| LNB | control | P03952 | KLKB1 | 0.00873 | -0.14870 | blood coagulation [GO:0007596] |
| LNB | control | P04003 | C4BPA | 0.04015 | 0.11068 | innate immune response [GO:0045087] |
| LNB | control | P04180 | LCAT | 0.00839 | -0.14726 | cholesterol metabolic process [GO:0008203] |
| LNB | control | P04196 | HRG | 0.02380 | -0.16257 | fibrinolysis [GO:0042730] |
| LNB | control | P04275 | VWF | 0.00001 | -1.15025 | blood coagulation [GO:0007596] |
| LNB | control | P04430 | IGKV1-16 | 0.04914 | -0.21898 | immune response [GO:0006955] |
| LNB | control | P04433 | IGKV3-11 | 0.00013 | -0.35888 | immune response [GO:0006955] |
| LNB | control | P05109 | S100A8 | 0.00013 | -0.99785 | innate immune response [GO:0045087] |
| LNB | control | P05154 | SERPINA5 | 0.04019 | 0.21592 | lipid transport [GO:0006869] |
| LNB | control | P05155 | SERPING1 | 0.00778 | 0.24329 | innate immune response [GO:0045087] |
| LNB | control | P05452 | CLEC3B | 0.01633 | -0.19006 | ossification [GO:0001503] |
| LNB | control | P05546 | SERPIND1 | 0.00841 | 0.16932 | blood coagulation [GO:0007596] |
| LNB | control | P06312 | IGKV4-1 | 0.00054 | -0.30975 | immune response [GO:0006955] |
| LNB | control | P06396 | GSN | 0.00687 | -0.18286 | positive regulation of gene expression [GO:0010628] |
| LNB | control | P06702 | S100A9 | 0.00002 | -1.00485 | innate immune response [GO:0045087] |
| LNB | control | P07195 | LDHB | 0.00565 | 0.29196 | other |
| LNB | control | P07225 | PROS1 | 0.00067 | 0.14975 | blood coagulation [GO:0007596] |
| LNB | control | P07737 | PFN1 | 0.04692 | 0.72079 | protein stabilization [GO:0050821] |
| LNB | control | P07996 | THBS1 | 0.01845 | -0.45506 | immune response [GO:0006955] |
| LNB | control | P08185 | SERPINA6 | 0.01638 | -0.17548 | other |
| LNB | control | P0C0L4 | C4A | 0.01764 | 0.21733 | innate immune response [GO:0045087] |
| LNB | control | P0DOY2;P0DOY3 | IGLC2;IGLC3 | 0.00386 | -0.43963 | adaptive immune response [GO:0002250] |
| LNB | control | P13473 | LAMP2 | 0.00760 | -0.22657 | protein stabilization [GO:0050821] |
| LNB | control | P14151 | SELL | 0.03272 | -0.20318 | cell adhesion [GO:0007155] |
| LNB | control | P20742 | PZP | 0.02527 | -0.55127 | other |
| LNB | control | P35858 | IGFALS | 0.00310 | -0.23778 | cell adhesion [GO:0007155] |
| LNB | control | P60709 | ACTB | 0.02817 | 0.52901 | platelet aggregation [GO:0070527] |
| LNB | control | P61769 | B2M | 0.01854 | 0.24553 | positive regulation of immune response [GO:0050778] |
| LNB | control | Q14624 | ITIH4 | 0.00441 | 0.11570 | acute-phase response [GO:0006953] |
| LNB | control | Q15582 | TGFBI | 0.00302 | -0.34742 | cell adhesion [GO:0007155] |
| LNB | control | Q16610 | ECM1 | 0.00008 | -0.32219 | inflammatory response [GO:0006954] |
| LNB | control | Q96IY4 | CPB2 | 0.00369 | 0.18317 | blood coagulation [GO:0007596] |
| LNB | control | Q9UGM5 | FETUB | 0.02573 | -0.25847 | other |


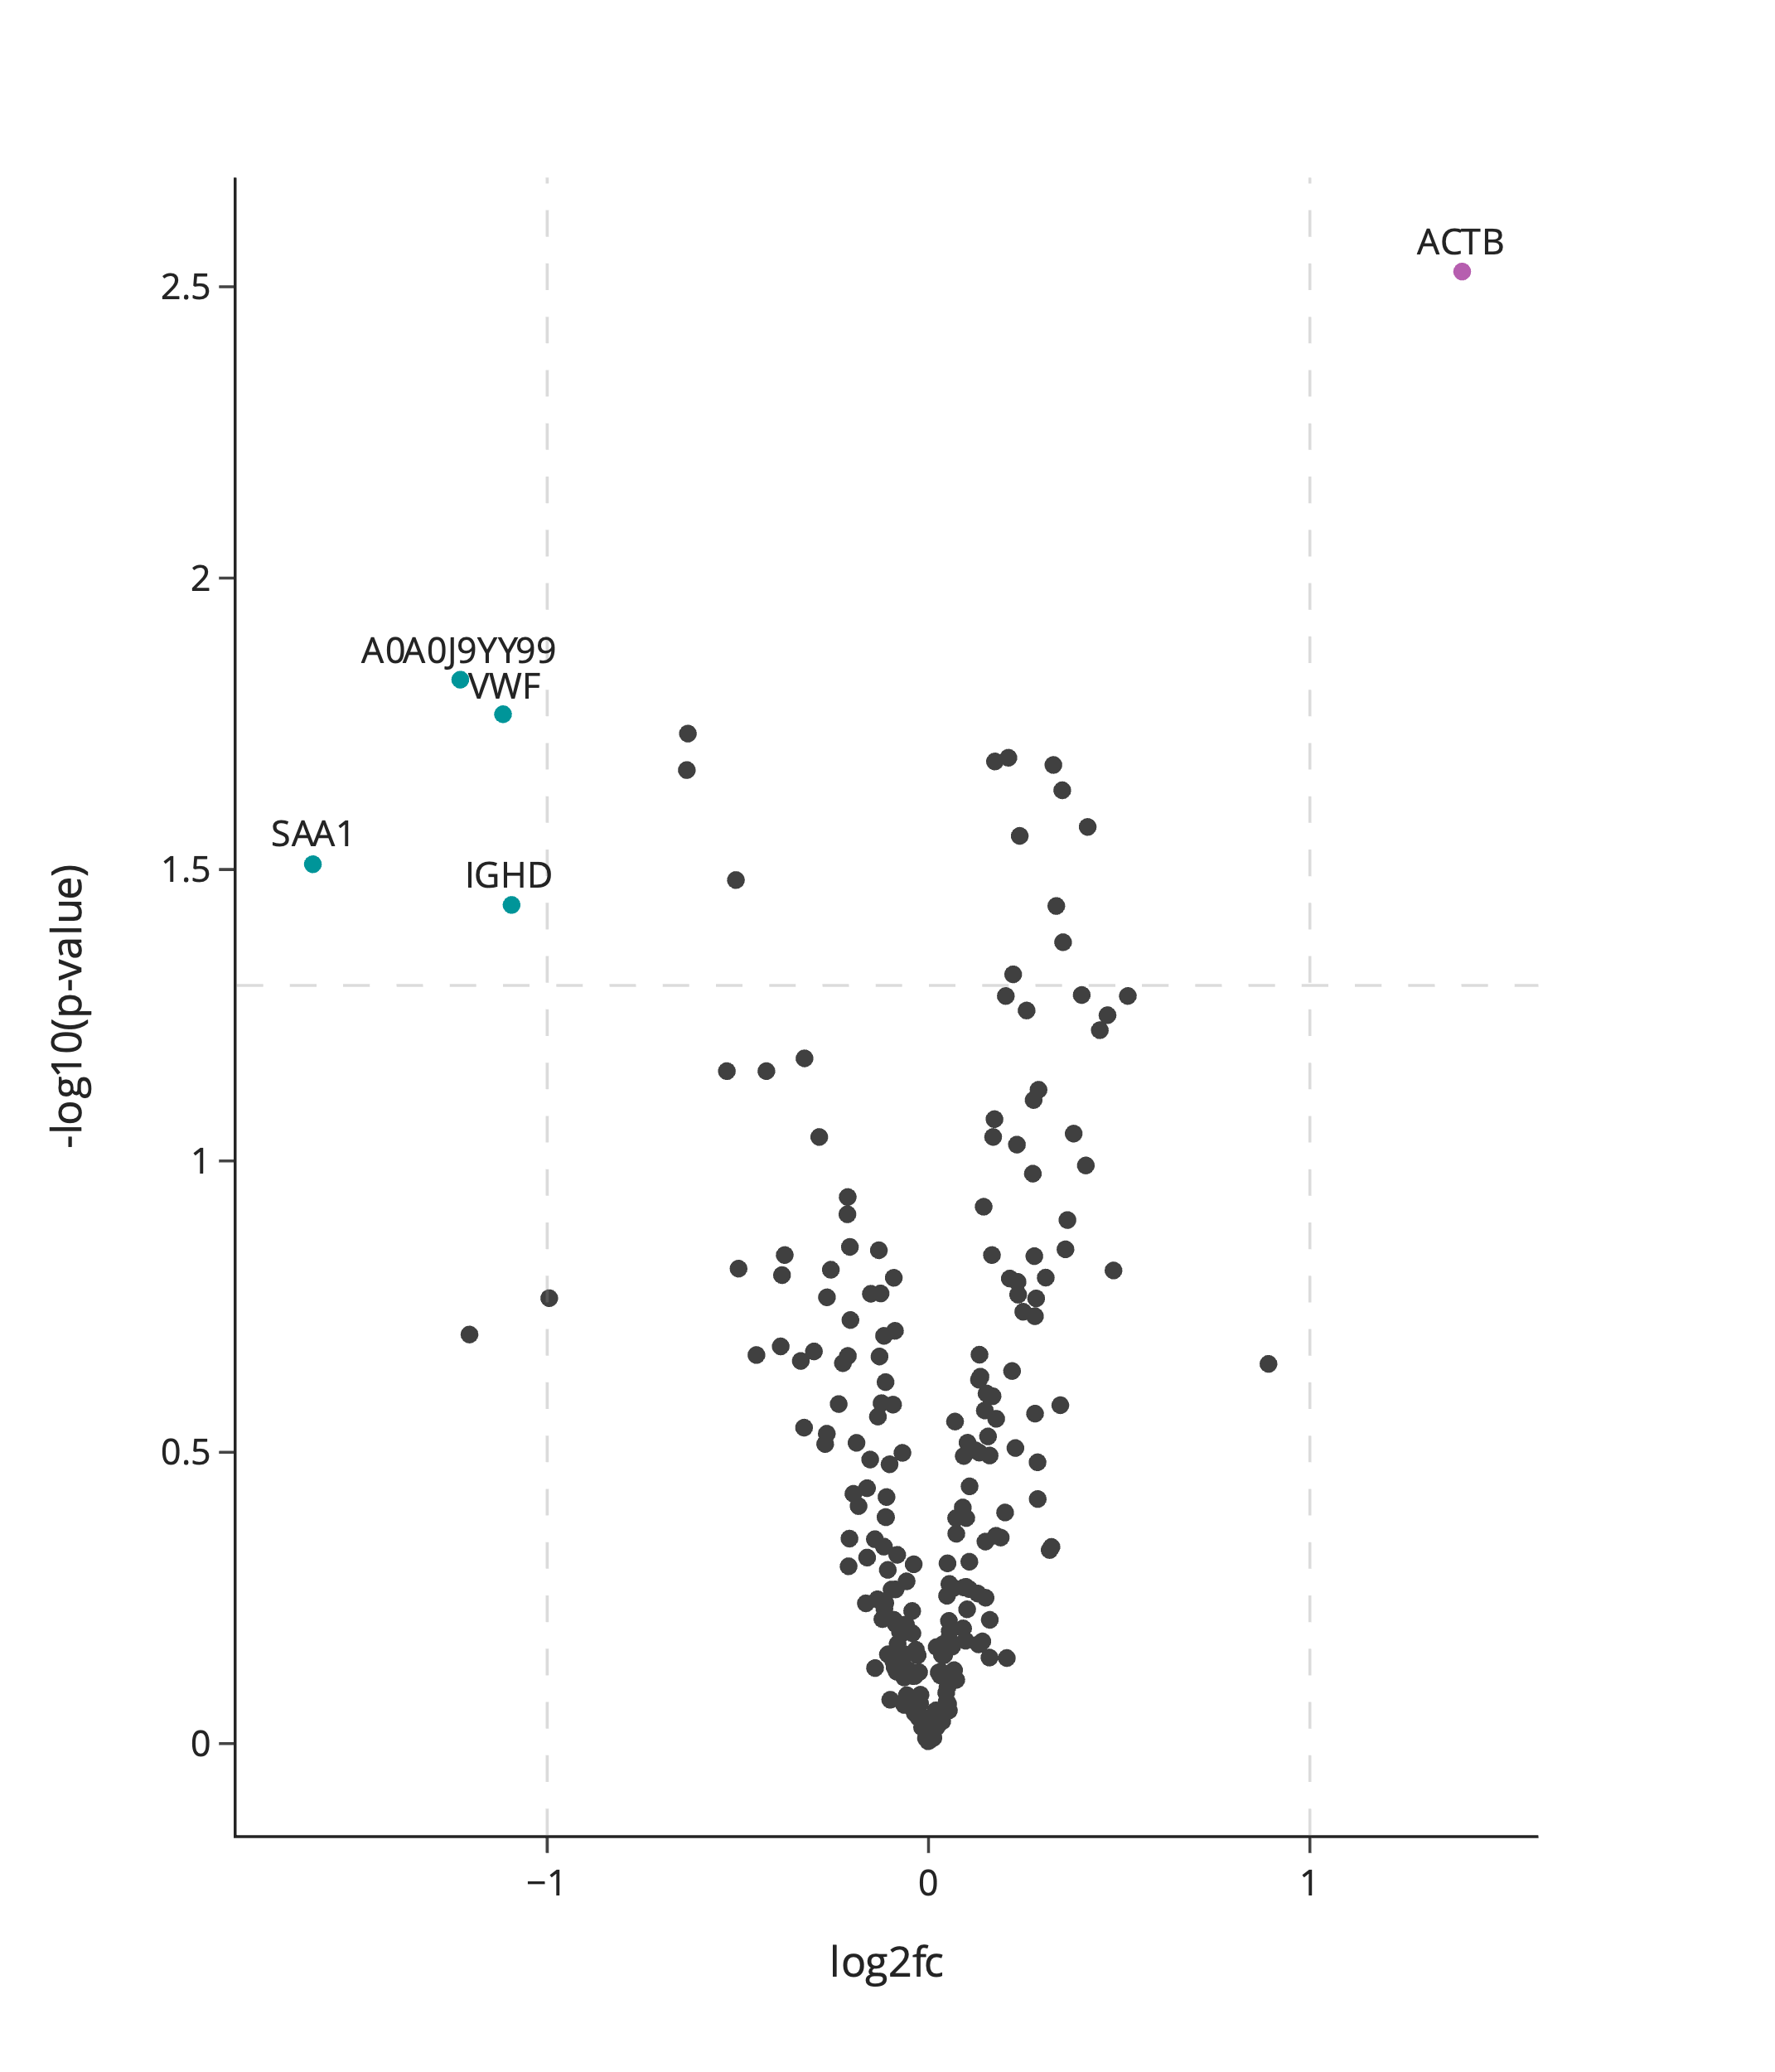


**Figure 7** Volcano plot highlighting protein differences between Lyme neuroborreliosis (LNB) and controls in the plasma validation cohort. Each point represents a protein, the colour purple represents upregulated proteins with a log2 fold change (FC) larger than 1, the colour blue represents downregulated proteins with a log2 fold smaller larger than -1 and the colour grey represents proteins with a log2 fold change between -1 and 1 or non-significant proteins. X-axis depicts log2 fold change and y-axis depicts the log 10 adjusted p-value. Horizontal dashed lines represent the significance threshold after multiple hypothesis correction at p=0.05. Vertical dashed lines represent large log2 fold changes: above 1 or below -1.


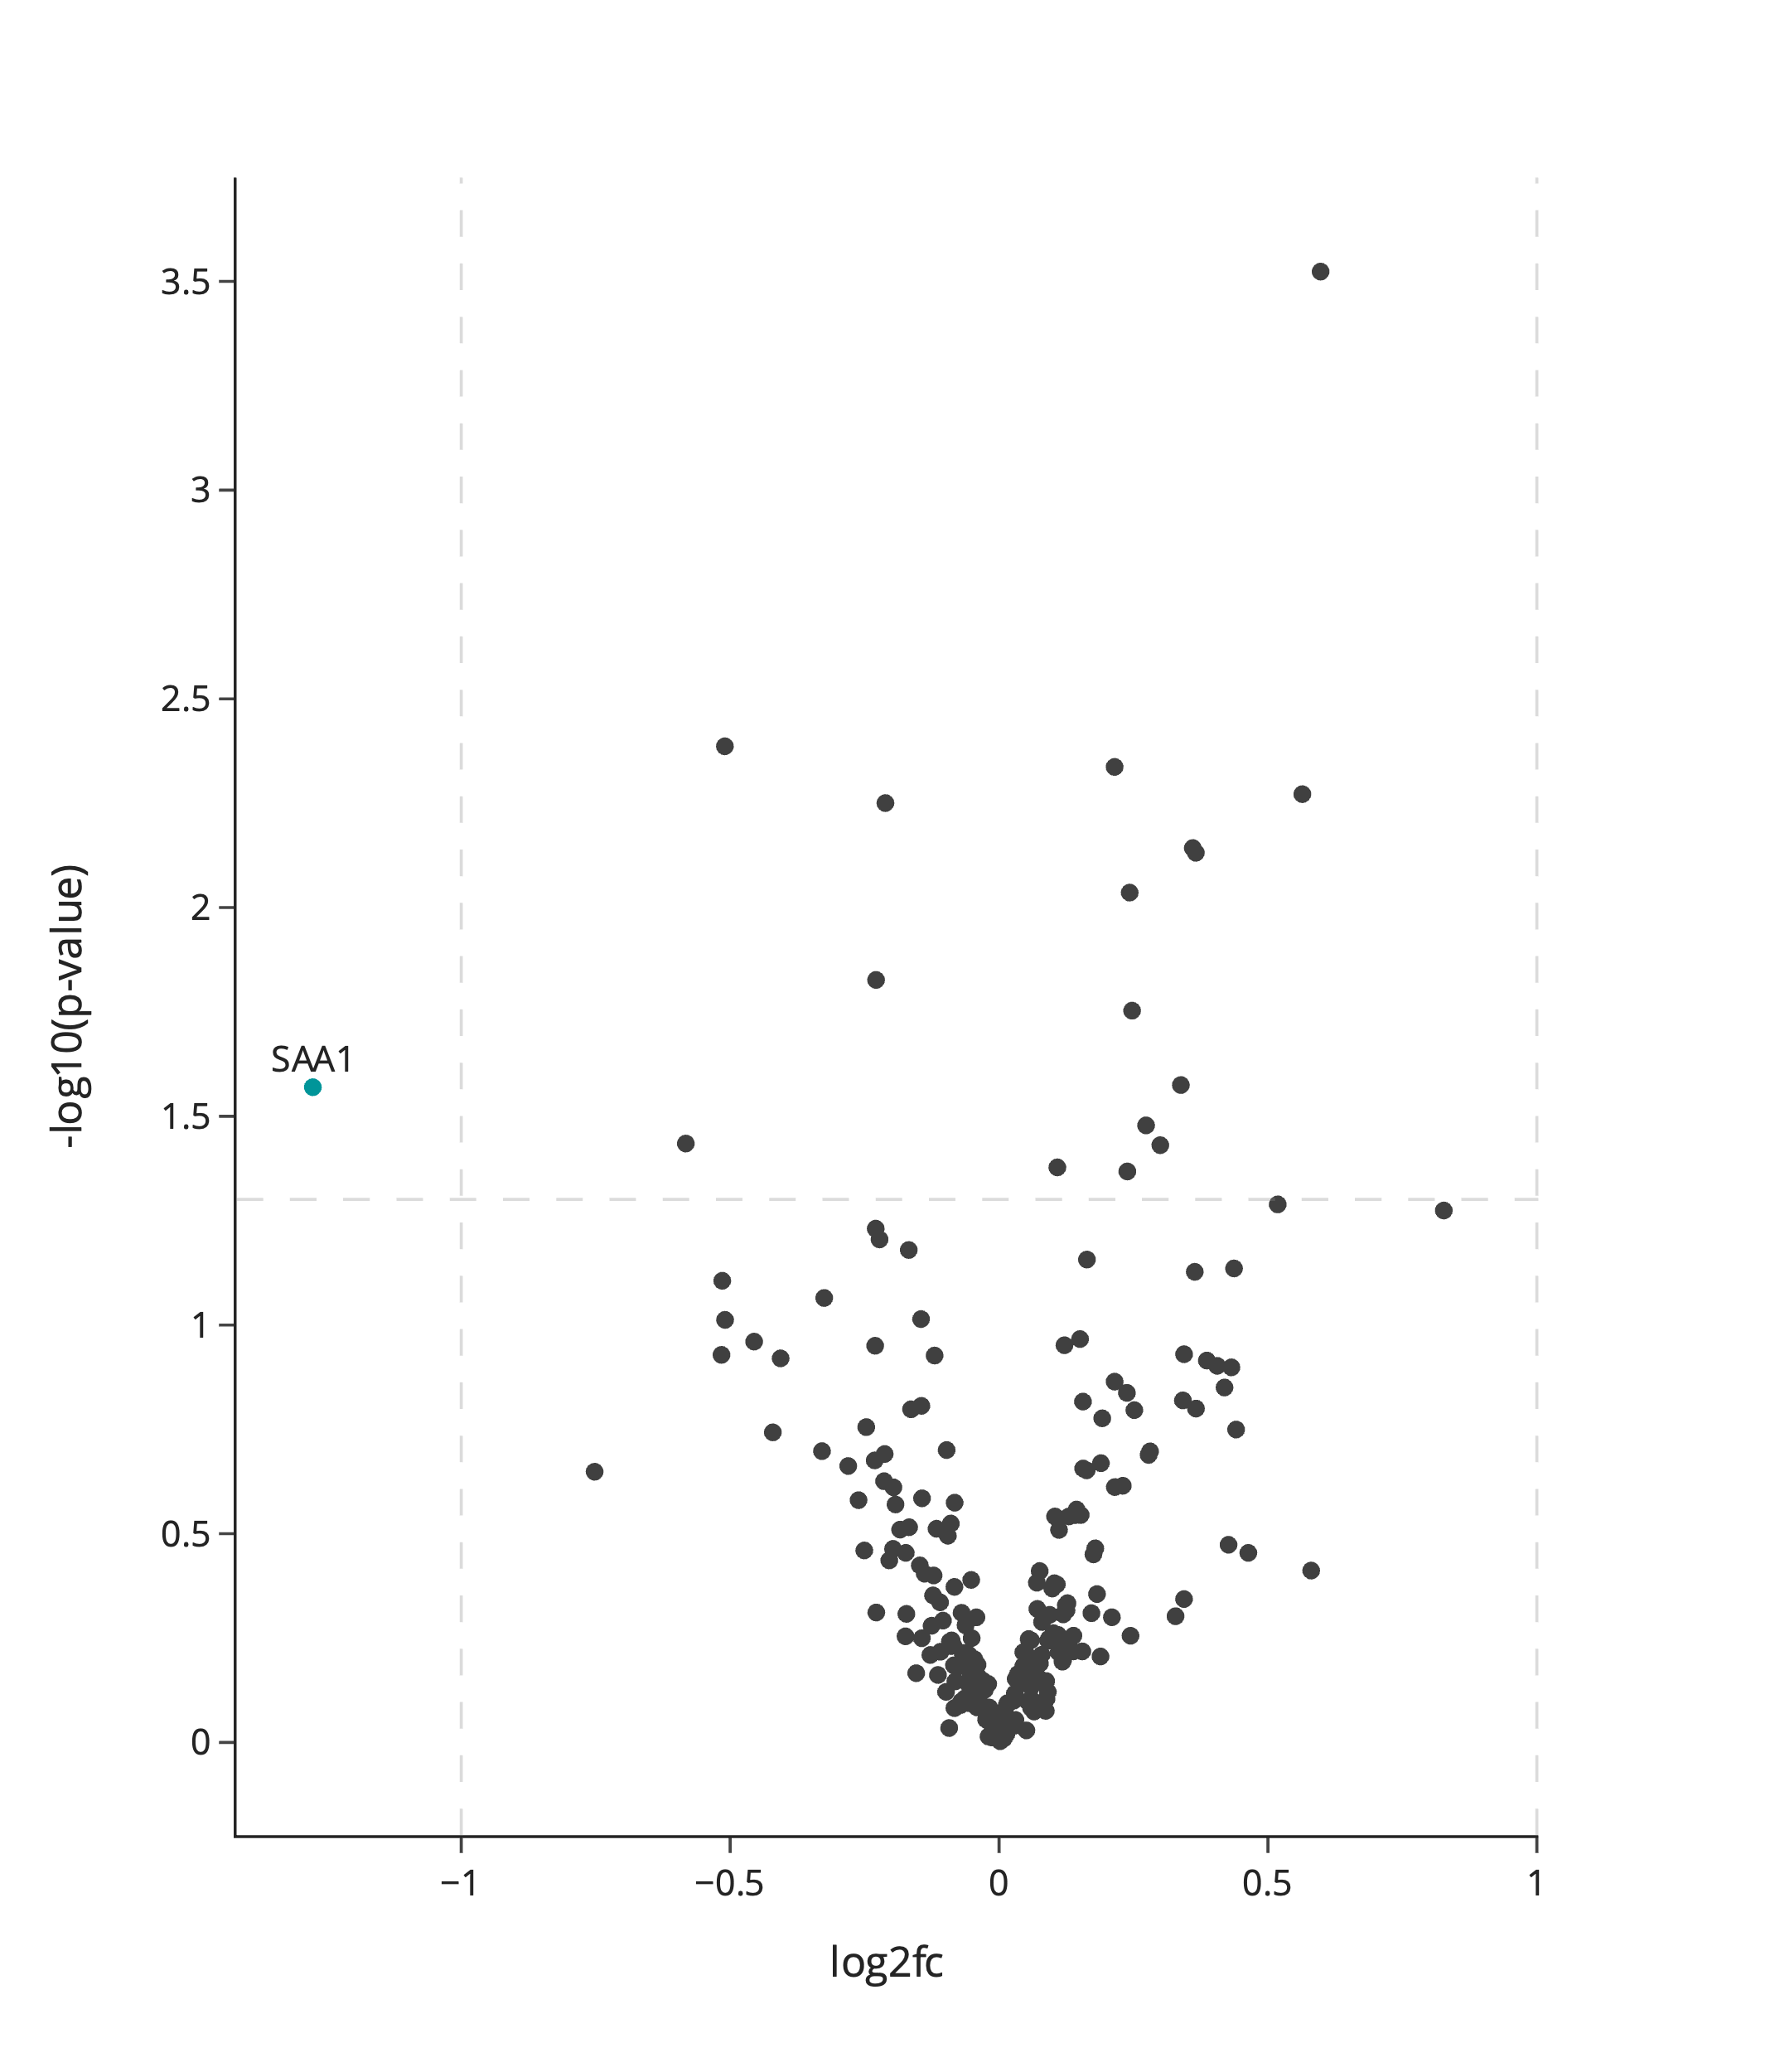


**Figure 8** Volcano plot highlighting protein differences between Lyme neuroborreliosis (LNB) and viral meningitis (VM) the plasma validation cohort. Each point represents a protein, the colour purple represents upregulated proteins with a log2 fold change (FC) larger than 1, the colour blue represents downregulated proteins with a log2 fold smaller larger than -1 and the colour grey represents proteins with a log2 fold change between -1 and 1 or non-significant proteins. X-axis depicts log2 fold change and y-axis depicts the log 10 adjusted p-value. Horizontal dashed lines represent the significance threshold after multiple hypothesis correction at p=0.05. Vertical dashed lines represent large log2 fold changes: above 1 or below -1.


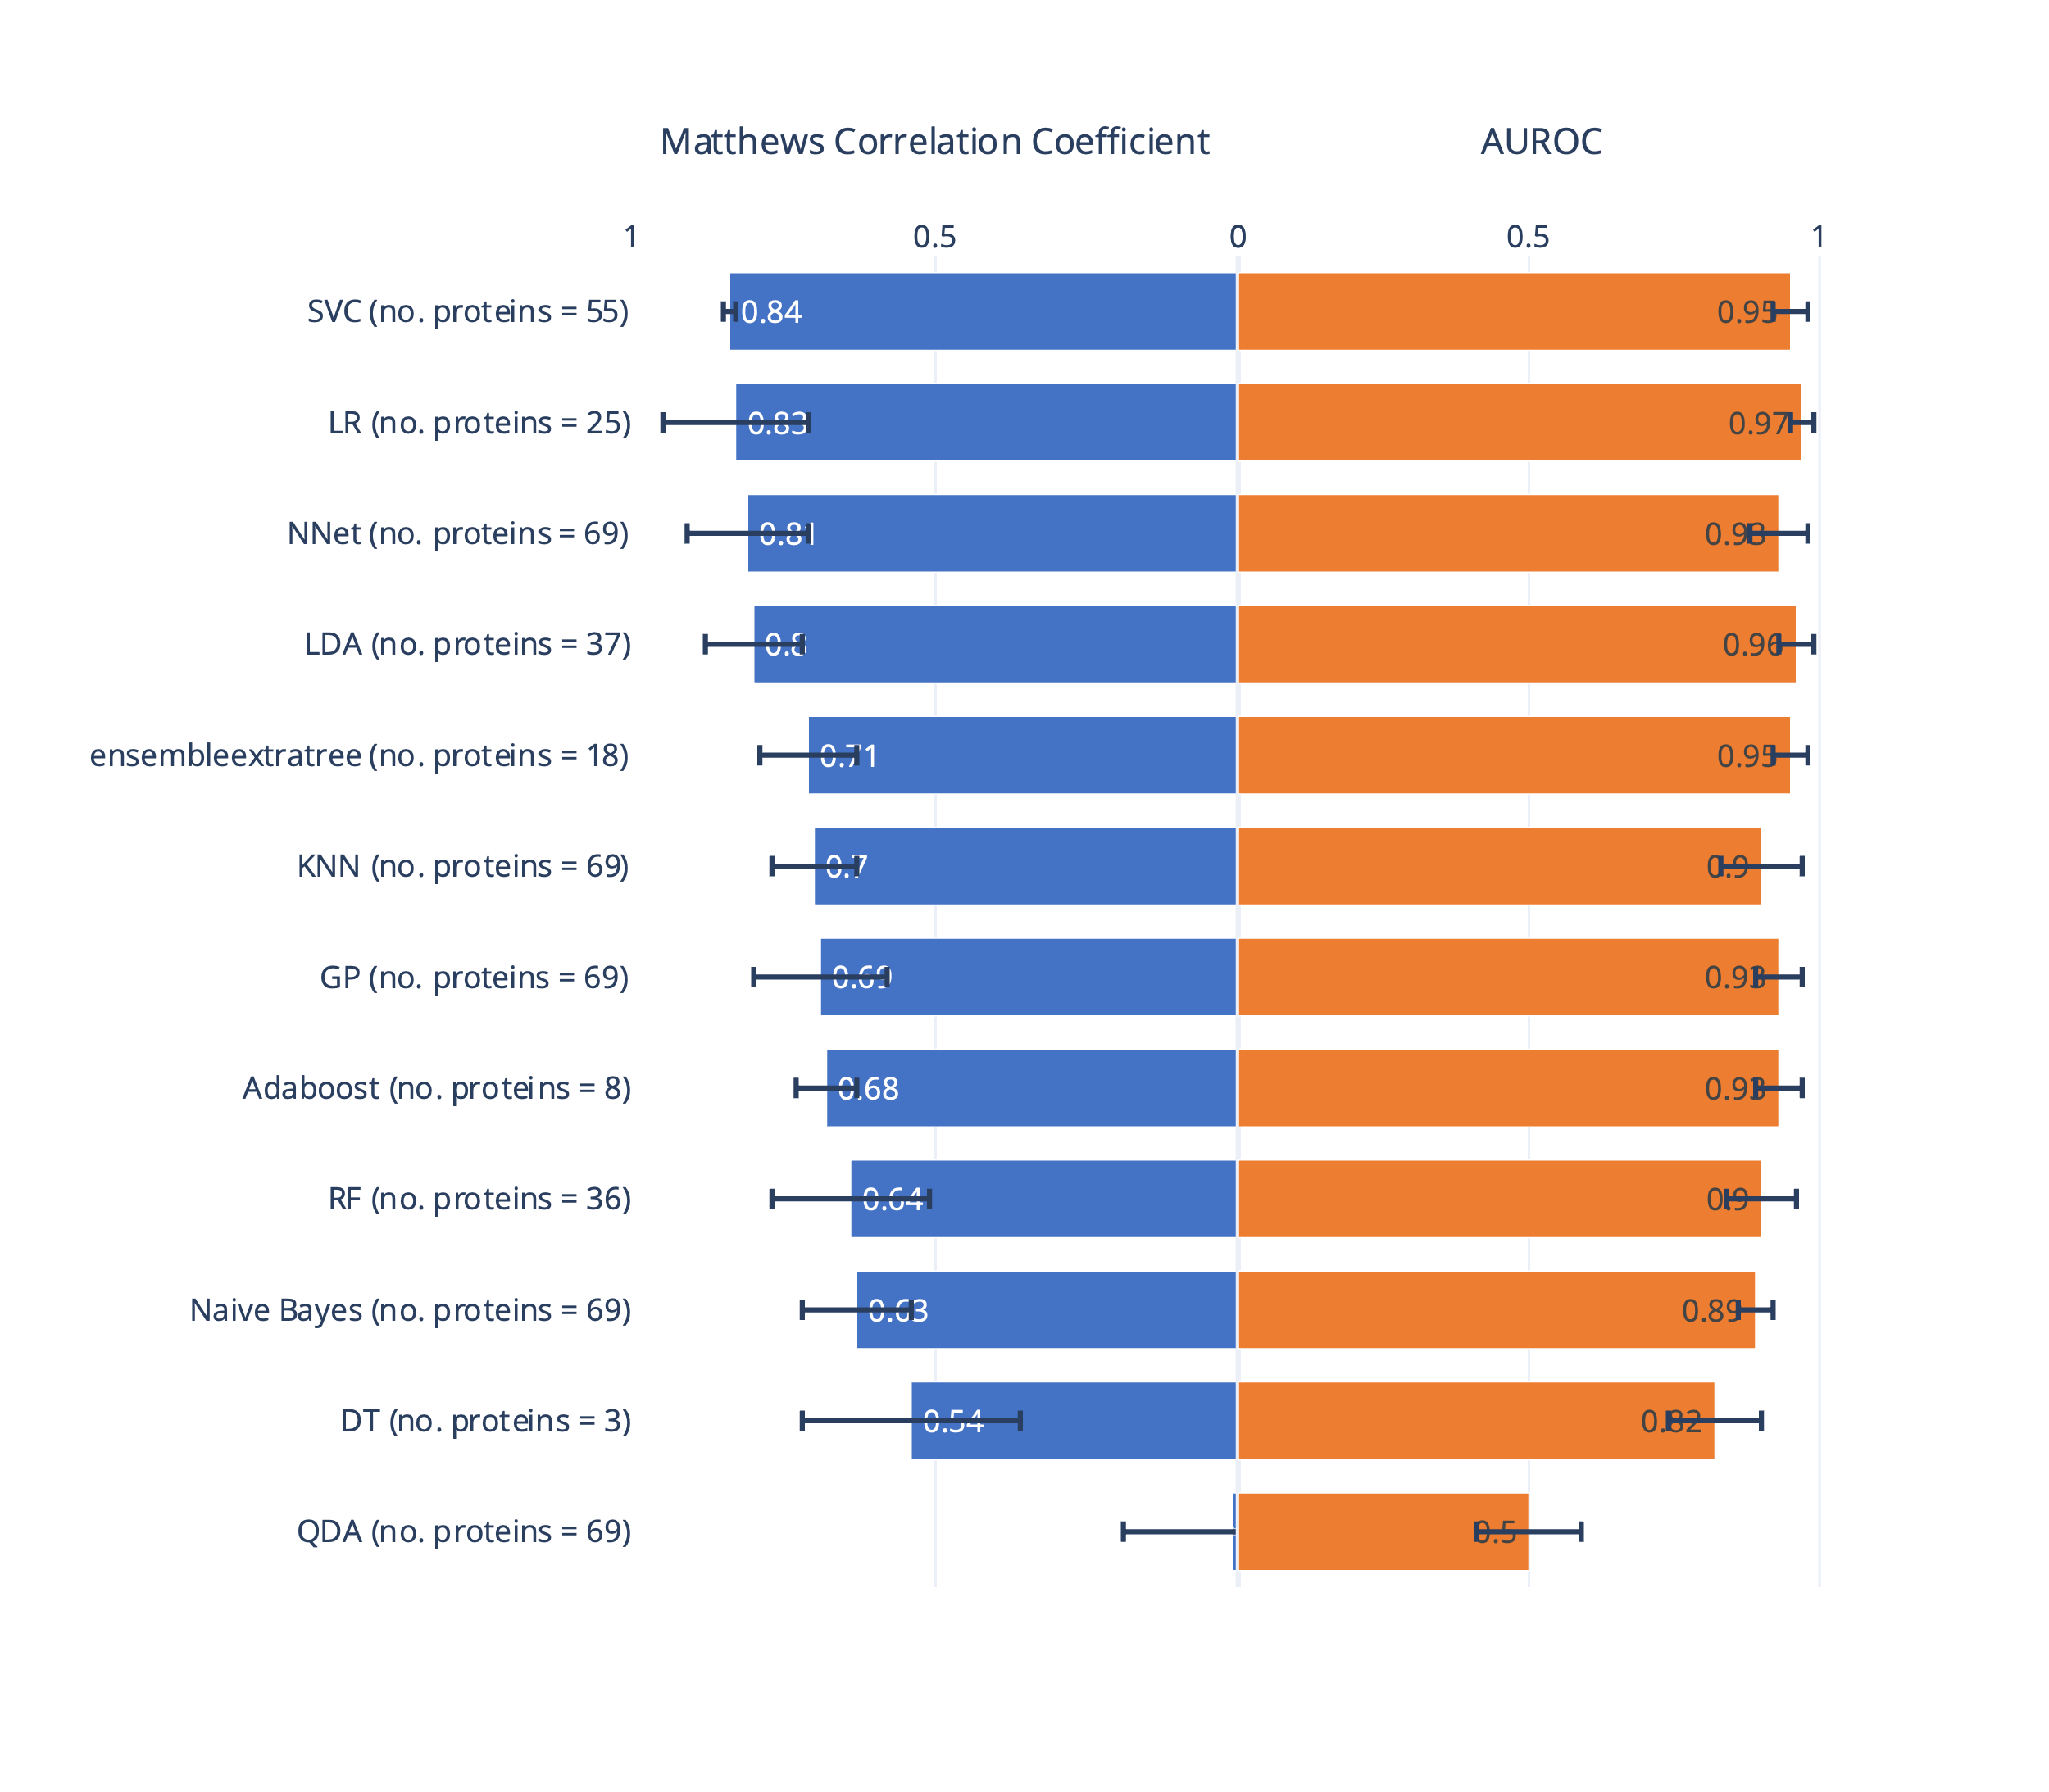


**Figure 9** Output of the cross-validation grid search of algorithms, hyperparameters, and the number of proteins is displayed as the area under the receiver operating characteristic curve (AUROC) and Matthews Correlation Coefficient (MCC) from the predictions on the test sets. The model was trained to classify Lyme neuroborreliosis and controls. The number of proteins used in each model is shown to the right. The error bars represent the standard deviation across the 3-fold cross-validation runs.

**Table 3**  Overlap of significant proteins from the comparison of Lyme neuroborreliosis (LNB) to viral meningitis (VM) or controls in cerebrospinal fluid (CSF) and plasma. Significant differences in protein levels are represented by log(2) fold change. Non-signigicant findings are not included (missing values).

|  | LNB compared to: | | | |
| --- | --- | --- | --- | --- |
| Gene Names | VM (CSF) | Control (CSF) | VM (plasma) | Control (plasma) |
| VTN | 0.03486 |  |  | -0.04154 |
| HRG | 0.10060 |  | 0.07463 |  |
| IGKV2-28 |  |  | -0.29411 |  |
| CPB2 | 0.12280 |  |  |  |
| CLEC3B | -0.05174 |  | 0.10654 |  |
| C6 | -0.13418 |  |  | -0.07783 |
| PROC |  | -0.19327 |  | 0.06601 |
| F2 | -0.00860 |  | -0.01883 |  |
| CD14 | 0.12670 |  |  | -0.12986 |
| SELL | 0.04149 |  |  |  |
| AHSG | -0.19228 |  |  |  |
| SERPINA4 | 0.18069 |  |  | 0.00656 |
| IGLC7 |  |  | -0.04297 |  |
| TTR | 0.03729 |  | -0.06505 |  |
| S100A9 |  | 0.84752 |  |  |
| APOC3 |  | -0.00084 |  | 0.15146 |
| GPLD1 | 0.03883 |  |  | -0.06731 |
| IGKV1-5 |  |  |  | -0.21853 |
| FETUB | 0.03901 |  | -0.16283 |  |
| APOC1 | -0.05587 |  |  | 0.08117 |
| ITIH4 | 0.10830 |  | 0.02824 |  |
| FGG | 0.15930 |  |  | -0.12332 |
| C9 | 0.17234 |  |  | 0.12583 |
| SERPINA5 | -0.23208 |  |  |  |
| KNG1 | -0.00931 |  | -0.03355 |  |
| IGFALS | 0.09572 |  |  |  |
| HPX | 0.04750 |  |  |  |
| IGHV3-38 | 0.29536 |  |  |  |
| C2 | 0.08790 |  |  | 0.02378 |
| ATRN |  |  |  | -0.06195 |
| IGKV1-27 | 0.10777 |  |  | -0.15922 |
| KLKB1 | 0.10671 |  | 0.01229 |  |
| IGHV1-18 |  |  |  | -0.13717 |
| APCS | -0.15666 |  | -0.00795 |  |
| CRP |  |  |  | 0.06933 |
| IGHV3-15 |  |  | -0.22683 |  |
| LUM |  |  |  | 0.01354 |
| IGKV2-40 | 0.36117 |  | -0.20312 |  |
| C4BPA | 0.33873 |  | 0.11014 |  |
| APOD |  |  |  | 0.18827 |
| C3 |  |  | 0.04487 |  |
| S100A8 | -1.08517 |  |  |  |
| IGHG4 | 0.20368 |  | -0.10122 |  |
| FGB | 0.19970 |  |  | -0.06845 |
| APOE | 0.11455 |  |  | 0.14129 |
| RBP4 | 0.18832 |  |  | 0.12787 |
| IGFBP6 | -0.21004 |  |  | 0.13004 |
| IGKV1-16 | 0.44449 |  | -0.15719 |  |
| APOA4 | -0.04396 |  |  | 0.05237 |
| APOM | 0.11486 |  |  | -0.07277 |
| ACTB | -0.16814 |  |  |  |
| B2M | 0.11084 |  | 0.28193 |  |
| IGKV3D-20 |  |  | -0.30725 |  |
| PLG | -0.04959 |  | -0.07125 |  |
| C1QC | 0.28355 |  |  |  |
| C5 | 0.28369 |  | 0.05656 |  |
| C1RL | -0.04385 |  |  | -0.04555 |
| FGA | -0.04725 |  |  |  |
| PFN1 | -0.41513 |  |  |  |
| IGKV6-21 |  |  |  | -0.16605 |
